# Supplementary material for: Written records of historical tsunamis in the northeastern South China Sea – challenges associated with developing a new integrated database
Source: Copernicus journal article supplement (doi:10.5194/nhess-10-1793-2010), 2010-09-01
Supplement: Supplementary file 1 [file nhess-10-1793-2010-supplement.pdf]

Table S1. Full list of tsunami entries in the northeast of the South China Sea region recorded in 15 source databases.

| Event Number (#) | <sup>1,2</sup> Date of event (Time) | Tsunami Location                        | Lat. /Long.                                    | <sup>3</sup> Cause | Source location (Lat. /Long.)       | <sup>4</sup> Assigned validity in existing database | <sup>5</sup> Tsu. Int. 1 | <sup>5</sup> Tsu. Int. 2 | <sup>6</sup> Max. water height (m) |
|------------------|-------------------------------------|-----------------------------------------|------------------------------------------------|--------------------|-------------------------------------|-----------------------------------------------------|--------------------------|--------------------------|------------------------------------|
| 1                | <u>1076-10-31</u>                   | Chaoyang (Guangdong)                    |                                                | E                  | Guangdong                           |                                                     |                          |                          |                                    |
|                  | 1076-10-31                          | Chaoyang                                |                                                |                    |                                     | Doubtful                                            |                          |                          |                                    |
|                  | 1076-10-31~11-28                    | Chao-an (former Haiyang), Chaoyang      |                                                |                    |                                     |                                                     |                          |                          |                                    |
|                  | 1076-10-31~11-28                    | Chao-an (former Haiyang), Chaoyang      |                                                |                    |                                     |                                                     |                          |                          |                                    |
|                  | 1076-10-31                          | Chao-an (former Haiyang), Chaoyang      | 23.5/116.5                                     |                    |                                     | Possible tsunami but erroneous report               |                          |                          |                                    |
|                  | <u>1076-10-31</u>                   |                                         |                                                | M                  | South China Sea                     | 1 [very doubtful]                                   | 1.00                     |                          |                                    |
|                  | <u>1076-10-31</u>                   |                                         |                                                | U                  | Chao-an, South China Sea (23.3/117) | 2 [questionable]                                    |                          |                          |                                    |
| 2                | 1353-8-1                            | Quanzhou                                |                                                |                    |                                     |                                                     |                          |                          |                                    |
|                  | 1353-8-1                            | Quanzhou                                |                                                |                    |                                     |                                                     |                          |                          |                                    |
| 3                | 1604-12-29                          |                                         |                                                | E (8)              | Offshore Quanzhou (25/119.5)        |                                                     |                          |                          |                                    |
|                  | 1604-12-29                          |                                         |                                                | E (8)              | Quanzhou                            |                                                     |                          |                          |                                    |
|                  | 1604-12-29                          | Quanzhou                                |                                                | E (8)              | Fujian (25/119.5)                   |                                                     |                          |                          |                                    |
|                  | 1604-12-29                          | North of Taiwan Strait                  |                                                |                    |                                     |                                                     |                          |                          |                                    |
|                  | 1604-12-29                          | Quanzhou (Fujian)                       |                                                | E (7.5)            | Sea outside Quanzhou (24.7/119)     |                                                     |                          |                          |                                    |
|                  | 1604-12-29                          | North of Taiwan Strait                  |                                                |                    |                                     |                                                     |                          |                          |                                    |
|                  | 1604-12-29                          | Quanzhou, Shaxian                       |                                                | E (7.5)            | Quanzhou (25/119.5)                 |                                                     |                          |                          |                                    |
|                  | 1604-12-29                          | Quanzhou (Fujian)                       | 24.7/119                                       | E (7.5)            |                                     | True                                                |                          |                          |                                    |
|                  | <u>1604-12-29</u>                   |                                         |                                                | E (8)              | Fujian off coast (25/119.5)         | 1 [very doubtful]                                   |                          |                          |                                    |
| 4                | <u>1640-9-16~11-14</u>              | Chenghai, Chaoyang, Jieyang (Guangdong) |                                                | E                  | (23/117)                            | * [Valid]                                           |                          |                          |                                    |
|                  | 1640                                | Chenghai, Chaoyang, Jieyang (Guangdong) | 23.28/116.45,<br>23.17/116.36,<br>23.33/116.20 | E                  |                                     |                                                     |                          |                          |                                    |
|                  | 1640-9-16                           | Chenghai, Chaoyang, Jieyang (Guangdong) |                                                |                    |                                     |                                                     |                          |                          |                                    |
|                  | 1640-9-16~10-14                     | Jieyang, Chenghai, Chaoyang             |                                                |                    |                                     |                                                     |                          |                          |                                    |
|                  | 1640-9-16~10-14                     |                                         |                                                | E (5.75)           | Jieyang, Chenghai, Chaoyang         | 4 [tsunami]                                         |                          | 0                        |                                    |
|                  | 1640-9-16                           | Chaoyang, Huilai, Chenghai, Jieyang     |                                                | E (5.75)           | Shantou (23.5/116.5)                |                                                     |                          |                          |                                    |
|                  | 1640-9-16~10-4                      | Jieyang, Chenghai, Chaoyang             |                                                |                    |                                     |                                                     |                          |                          |                                    |
|                  | 1640-9-16~10-14                     | Jieyang, Chenghai, Chaoyang             |                                                |                    |                                     |                                                     |                          |                          |                                    |
|                  | 1640-9~10                           | Jieyang, Chaoyang (Guangdong)           | 23.5/116.5                                     | E (5.75)           |                                     | Possible tsunami but erroneous report               |                          |                          |                                    |
|                  | <u>1640-9-16</u>                    |                                         |                                                | E                  | Guangdong (23/117)                  | 2 [questionable]                                    | 1.00                     |                          |                                    |
|                  | <u>1640-9-16</u>                    |                                         |                                                | T                  | South China Sea (23.5/116.5)        | 2 [questionable]                                    | 1                        |                          |                                    |
| 5                | 1641-9-16~11-26                     |                                         |                                                | E (5.75)           | Chenghai, Chaoyang (23.5/116.5)     |                                                     |                          |                          |                                    |
|                  | 1641-9-16~11-26                     |                                         |                                                |                    | Chenghai, Chaoyang                  |                                                     |                          |                          |                                    |
|                  | 1641-9-16~11-26                     | Chenghai, Chaoyang                      |                                                | E (5.75)           | Chenghai, Chaoyang (23.5/116.5)     |                                                     |                          |                          |                                    |
|                  | 1641-11-26                          | Jieyang, Chaoyang (Guangdong)           | 23.5/116.5                                     | E (5.75)           |                                     | Did not pass validation                             |                          |                          |                                    |
| 6                | 1660                                | Taiwan                                  |                                                |                    |                                     |                                                     |                          |                          |                                    |
|                  | <u>1660</u>                         |                                         |                                                | U                  | South China Sea                     | -1 [erroneous entry]                                |                          |                          |                                    |

| Event Number (#) | Reported observation/ highlights                                                                                                                                                                                                                                                                                                                                                                                                                                                                                                                                                                                                                                                                                                                                                                               | References                                                                                                                                                                                                                                                                                                                                                                                                                                                                                                                                                                                                                                                                                                                                                                                                                                                                                                         |
|------------------|----------------------------------------------------------------------------------------------------------------------------------------------------------------------------------------------------------------------------------------------------------------------------------------------------------------------------------------------------------------------------------------------------------------------------------------------------------------------------------------------------------------------------------------------------------------------------------------------------------------------------------------------------------------------------------------------------------------------------------------------------------------------------------------------------------------|--------------------------------------------------------------------------------------------------------------------------------------------------------------------------------------------------------------------------------------------------------------------------------------------------------------------------------------------------------------------------------------------------------------------------------------------------------------------------------------------------------------------------------------------------------------------------------------------------------------------------------------------------------------------------------------------------------------------------------------------------------------------------------------------------------------------------------------------------------------------------------------------------------------------|
| 1                | <p>Dubious tsunami. Probably storm surge.</p> <p>Chaoyang: Tidal waves recorded. Homes destroyed and people died. Probably storm origin.</p> <p>Haiyang &amp; Chaoyang: Sea-surge, houses destroyed, residents drowned.</p> <p>Quoted Li (1981). The 'Sea-surge' can be caused by tsunami or typhoon.</p> <p>Haiyang &amp; Chaoyang: Sea-surge occurred/ A typhoon and sea surge occurred, damaged houses and crops.</p> <p>Chaoan: tidal sea waves, 'probably waves of storm origin'.</p>                                                                                                                                                                                                                                                                                                                     | <p>Iida et al., 1967 (Keimatsu, 1963)</p> <p>Soloviev and Go, 1974 ('History of Zong State'; Keimatsu, 1963; Iida et al., 1967; Cox, 1970)</p> <p>Li, 1981 (&lt;Dynasty Zong record&gt;)</p> <p>Li et al., 2006 (&lt;Dynasty Zong record &gt;; Li, 1981; Li, 1991)</p> <p>Mak and Chan, 2007 (&lt;Dynasty Zong record &gt;; &lt;Chaoyang County record made in 1884&gt;)</p> <p>NGDC database (Soloviev and Go, 1974)</p> <p>NTL database (Soloviev and Go, 1974)</p>                                                                                                                                                                                                                                                                                                                                                                                                                                              |
| 2                | <p>Sea with 3 tides in a day.</p> <p>Quoted Li (1981). The event can be caused by tsunami or typhoon.</p>                                                                                                                                                                                                                                                                                                                                                                                                                                                                                                                                                                                                                                                                                                      | <p>Li, 1981 (&lt;Dynasty Yuan record&gt;)</p> <p>Li et al., 2006 (&lt;Dynasty Yuan record&gt;; Keimatsu, 1963; Li, 1981; Li, 1991)</p>                                                                                                                                                                                                                                                                                                                                                                                                                                                                                                                                                                                                                                                                                                                                                                             |
| 3                | <p>'Mountain, stone, and sea water were totally moving, many boats sank down, the ground was cracked apart.' (Gu et al., 1983)</p> <p>Quanzhou: intense earthquake, sea water were moved and boats sank.</p> <p>Quanzhou: Hill, rocks, sea water were all moving. Many boats sank.</p> <p>Gao et al. (1992) mentioned a storm-surge at Quanzhou in 1603 did have not mention if the 1604 earthquake caused a 'tidal disaster'. No publication record of any abnormal water condition resulting from this earthquake.</p> <p>Quanzhou: mountains and sea in motion, many boats sunk; Shaxian: streams and rivers spilled over.</p> <p>A great earthquake followed by many aftershocks, houses collapsed, many boats sank.</p> <p>Quanzhou: Sea surged, Shaxian: river water surged.</p>                         | <p>Zhou and Adams, 1986 (Gu et al., 1983)</p> <p>Yang, 1987 (Zhou and Adams, 1986)</p> <p>Lee, 1988 (Chinese Academy of Sciences, 1956; Zhou and Adams, 1986)</p> <p>Wang et al., 2005 (National Earthquake Administration, 1995)</p> <p>Li et al., 2006 (Yang, 1987; Bao et al., 1991; Gao et al., 1992)</p> <p>Wong and Chan, 2006</p> <p>Mak and Chan, 2007 (&lt;Quanzhou historical record&gt;; Zhuo and Chen, 1983)</p> <p>NGDC database (Gu et al., 1989)</p>                                                                                                                                                                                                                                                                                                                                                                                                                                                |
| 4                | <p>Earthquake and tsunami.</p> <p>Earthquake and tsunami reported.</p> <p>Earthquake at Guangdong, Tsunami at 3 cities (Chenghai, Chaoyang, Jieyang).</p> <p>Sea surge, frequent earthquakes.</p> <p>Frequent earthquakes, flooding from sea and lake.</p> <p>Tides overflowed due to an earthquake near Shantou.</p> <p>Frequent earthquakes in the month and tides overflowed.</p> <p>'Frequent earthquakes, and sea surge' (Keimatsu, 1963). Literally it is unclear that if earthquakes and sea surge occurred shortly after one another, or there were earthquakes and sea surges within this time period.</p> <p>There was sea-surge and frequent earthquakes/ Sea-surge, then frequent earthquakes at winter. / Some dated 16 September 1640.</p> <p>Chenghai, Chaoyang, Jieyang: tsunami observed.</p> | <p>Iida et al., 1967 (Keimatsu, 1963)</p> <p>Berninghausen, 1969 (Keimatsu, 1963)</p> <p>Soloviev and Go, 1974 ('Chronicles'; Keimatsu, 1963; Iida et al., 1967; Berninghausen, 1969; Cox, 1970)</p> <p>Li, 1981 (&lt;Chieyang county report&gt;; &lt;Chenghai county report&gt;; &lt;Chaoyang county report&gt;)</p> <p>Yang, 1987 (Soloviev and Go, 1974; Lu, 1984; Iida, 1984; NGDC &amp; WDC-A, 1984)</p> <p>Lee, 1988 (Chinese Academy of Sciences, 1956; Zhou and Adams, 1986)</p> <p>Yü, 1994 (&lt;Chieyang county report&gt;; &lt;Chenghai county report&gt;; &lt;Chaoyang county report&gt;; Li, 1991)</p> <p>Li et al., 2006 (Keimatsu, 1963; Bao et al., 1991; Kao et al., 1992)</p> <p>Mak and Chan, 2007 (&lt;Chaozhou record made in 1661&gt;; &lt;Chaozhou record made in 1694&gt;)</p> <p>NGDC database (Iida et al., 1967; Soloviev and Go, 1974)</p> <p>NTL database (Soloviev and Go, 1974)</p> |
| 5                | <p>An earthquake occurred. No observations of the sea were reported.</p>                                                                                                                                                                                                                                                                                                                                                                                                                                                                                                                                                                                                                                                                                                                                       | <p>Zhou and Adams, 1986</p> <p>Yang, 1987 (Zhou and Adams, 1986)</p> <p>Li et al., 2006 (Yang, 1987; Bao et al., 1991)</p> <p>Mak and Chan, 2007 (Chinese Academy of Sciences, 1956; Zhou and Adams, 1986)</p>                                                                                                                                                                                                                                                                                                                                                                                                                                                                                                                                                                                                                                                                                                     |
| 6                | <p>The sea was violently agitated and the ships dashed about.</p>                                                                                                                                                                                                                                                                                                                                                                                                                                                                                                                                                                                                                                                                                                                                              | <p>Berninghausen, 1969 (Mallet and Mallet, 1858)</p> <p>NGDC database (Cox et al., 1974)</p>                                                                                                                                                                                                                                                                                                                                                                                                                                                                                                                                                                                                                                                                                                                                                                                                                       |

| Event Number (#) | Date of event (Time)    | Tsunami Location      | Lat. /Long.  | Cause                    | Source location (Lat. /Long.)                                         | Assigned validity in existing database | Tsu. Int. 1 | Tsu. Int. 2 | Max. water height (m) |
|------------------|-------------------------|-----------------------|--------------|--------------------------|-----------------------------------------------------------------------|----------------------------------------|-------------|-------------|-----------------------|
| 7                | <u>1661-1-8 or 1-9</u>  | Taiwan                |              |                          |                                                                       | ? [Possible]                           |             |             |                       |
|                  | 1661-1-8 or 1-9         | Taiwan                |              | E                        |                                                                       |                                        |             |             |                       |
|                  | 1661-1-8 or 1-9         |                       |              | E                        | Taiwan                                                                |                                        |             |             |                       |
|                  | 1661-2-15               |                       |              | E (6)                    | South of Taiwan (23/120.2)                                            |                                        |             |             |                       |
|                  | 1661-1-8 or 9~2-15      |                       |              |                          | Southwestern Taiwan (23/120.1)                                        | 4 [tsunami]                            |             | 1           |                       |
|                  | 1661-2-15               | Anping (Tainan)       |              | E (6)                    | Near Tainan (23/120.2)                                                |                                        |             |             |                       |
|                  | 1661-1                  | Tainan (Taiwan)       |              | E (6.4)                  | ('Possible') Tainan                                                   |                                        |             | 0           |                       |
|                  | 1661-1-8                | Anping (Tainan)       |              | E                        |                                                                       |                                        |             |             |                       |
|                  | 1661-2-15               | Anping                |              | E (6)                    | Tainan (23/120.2)                                                     |                                        |             |             |                       |
|                  | 1661-1~2                | Tainan (Taiwan)       | 23/120.20    | E (6.5)                  |                                                                       | Did not pass validation                |             |             |                       |
|                  | <u>1661-1-8</u>         |                       |              | E (6.4)                  | Taiwan (23/120.1)                                                     | 2 [questionable]                       | 1.50        |             |                       |
| <u>1661-2-15</u> |                         |                       | E (6)        | Tainan (23/120.2)        | 0 [event that only caused a seiche or disturbance in an inland river] |                                        |             |             |                       |
| <u>1661-1-8</u>  |                         |                       | T            | South China Sea (23/120) | 2 [questionable]                                                      | 1.5                                    |             |             |                       |
| 8                | <u>1682-12</u>          |                       |              | U                        | South China Sea                                                       | -1 [erroneous entry]                   |             |             |                       |
| 9                | 1721-1-5                | Tainan (Taiwan)       |              | E (6/6.5)                | ('Possible') Chiayi/ Tainan                                           |                                        |             | -1          |                       |
|                  | 1721-1-5                | Tainan                |              |                          |                                                                       |                                        |             |             |                       |
| 10               | 1721-9                  |                       |              |                          | Tainan                                                                |                                        |             |             |                       |
|                  | 1721-9                  |                       |              |                          | Tainan                                                                |                                        |             |             |                       |
|                  | 1721-9                  | Tainan (Taiwan)       |              | E                        |                                                                       |                                        |             |             |                       |
|                  | 1721-9                  | Tainan                |              |                          |                                                                       |                                        |             |             |                       |
|                  | 1721-9                  | Tainan (Taiwan)       | 23/120.20    | E (6)                    |                                                                       | Possible tsunami but erroneous report  |             |             |                       |
|                  | <u>1721</u>             |                       |              | E                        | Tainan (23/120.2)                                                     | 1 [very doubtful]                      |             |             |                       |
| 11               | 1754-4                  | Danshui               |              |                          |                                                                       |                                        |             |             |                       |
|                  | 1754-4                  |                       |              |                          | Danshui (25.3/121.4)                                                  | 3 [probably tsunami]                   |             | 1           |                       |
|                  | 1754-4                  | Danshui (Taipei)      |              | E (>6)                   | (25.3/121.4)                                                          |                                        |             |             |                       |
|                  | <u>1754-4</u>           |                       |              | U                        | East China Sea (25.3/121.4)                                           | 3 [probable]                           | 0.50        |             |                       |
|                  | <u>1754-4</u>           |                       |              | U                        | East China Sea (25.3/121.4)                                           | 2 [questionable]                       | 0.5         |             |                       |
| 12               | <u>1765-5</u>           | Near Guangdong        |              |                          |                                                                       | ? [Possible]                           |             |             | 9?                    |
|                  | 1765-5 end of month     | Near Guangdong        |              |                          |                                                                       |                                        |             |             | 9                     |
|                  | 1765-5 end of the month | Guangzhou             |              |                          |                                                                       |                                        |             |             | 9?                    |
|                  | 1765-5                  | Guangzhou (Guangdong) |              |                          |                                                                       | Very doubtful                          |             |             | 9                     |
|                  | 1765-5                  | Guangdong             | 23.13/113.33 | E (6)                    |                                                                       | Possible tsunami but erroneous report  |             |             | ~9                    |
|                  | 1765-5                  |                       |              | M                        | South China Sea (23.133/133.333)                                      | -1 [erroneous entry]                   | 2.00        |             | 9                     |
|                  | 1765-5                  | Guangdong             | 23.13/113.33 | U                        | Guangzhou, South China Sea (23.13/133.33)                             | 4 [definite]                           | 2           |             | 9                     |

| Event Number (#) | Reported observation/ highlights                                                                                                                                                                                                                                                                                                                                                                                                                                                                                                                                                                                                                                                                                                                                                                                                                                                                                                                                                     | References                                                                                                                                                                                                                                                                                                                                                                                                                                                                                                                                                                                                                                                                                                                                                                                                                                                                                                                    |
|------------------|--------------------------------------------------------------------------------------------------------------------------------------------------------------------------------------------------------------------------------------------------------------------------------------------------------------------------------------------------------------------------------------------------------------------------------------------------------------------------------------------------------------------------------------------------------------------------------------------------------------------------------------------------------------------------------------------------------------------------------------------------------------------------------------------------------------------------------------------------------------------------------------------------------------------------------------------------------------------------------------|-------------------------------------------------------------------------------------------------------------------------------------------------------------------------------------------------------------------------------------------------------------------------------------------------------------------------------------------------------------------------------------------------------------------------------------------------------------------------------------------------------------------------------------------------------------------------------------------------------------------------------------------------------------------------------------------------------------------------------------------------------------------------------------------------------------------------------------------------------------------------------------------------------------------------------|
| 7                | <p>Sea violently agitated, ships dashed about. Perhaps a sea quake.</p> <p>Local shocks, the sea was violently agitated. Probably the same event as 1660.</p> <p>3 ships in port spun in an unusual way. A flood tide from the sea rose so high that it looked like a mountain.</p> <p>Big tsunami at Anping. When tides came, numerous houses flooded.</p> <p>Sea was violently agitated. An-ping: sea rose suddenly by about 1m.</p> <p>Earthquake, followed by waves that brought water into air, formed shape of clouds.</p> <p>'3 ships in port were swung by water. In this earthquake, sea water has been brought up and formed shape of clouds' (Herport, 1659-1663)</p> <p>Boats sunk in harbour, seawater swirled up in the air.</p> <p>2 dates given for this event in previous literatures: 8 January and 15 February.</p> <p>Ships spun in unusual way, flood tide rose high like a mountain.</p> <p>Bamboo-built church at Shanhua collapsed. Turbulent sea water.</p> | <p>Iida et al., 1967 (Mallet, 1852; Milne, 1912; Heck, 1947)</p> <p>Berninghausen, 1969 (Milne, 1912)</p> <p>Soloviev and Go, 1974 (Schouten, 1708; Montbeillard, 1761; Hoff, 1840; Mallet, 1855; Perrey, 1862b; Milne, 1912; Heck, 1934, 1947; Ponyavin, 1965; Iida et al., 1967; Berninghausen, 1969)</p> <p>Zhou and Adams, 1986</p> <p>Yang, 1987 (Soloviev and Go, 1974; Iida, 1984; Zhou and Adams, 1986)</p> <p>Lee, 1988 (Zhou and Adams, 1986; Heck, 1947; Berninghausen, 1969; Lu, 1984)</p> <p>Yü, 1994 (Hsu, 1979; Hsu, 1981; Hsu H., 1983; Li, 1991)</p> <p>Li et al., 2006 (Herport, 1659-1663; Hsu H., 1983; Yang, 1987; Zheng and Yeh, 1989; Bao et al., 1991; Yü, 1994)</p> <p>Wong and Chan, 2006</p> <p>Mak and Chan, 2007 (Fang, 1969)</p> <p>NGDC database (Iida et al., 1967; Soloviev and Go, 1974; Iida, 1984)</p> <p>NGDC database (Gu et al., 1989)</p> <p>NTL database (Soloviev and Go, 1974)</p> |
| 8                |                                                                                                                                                                                                                                                                                                                                                                                                                                                                                                                                                                                                                                                                                                                                                                                                                                                                                                                                                                                      | NGDC database (Iida, 1984)                                                                                                                                                                                                                                                                                                                                                                                                                                                                                                                                                                                                                                                                                                                                                                                                                                                                                                    |
| 9                | <p>A number of earthquakes in the month, buildings collapsed and people killed. Sea water swelled due to earthquake.</p> <p>Quoted reports by Hsu H. (1983) and Yü (1994).</p>                                                                                                                                                                                                                                                                                                                                                                                                                                                                                                                                                                                                                                                                                                                                                                                                       | <p>Yü, 1994 (&lt;Taiwan government record&gt;; Lee et al., 1976; Hsu H., 1983)</p> <p>Li et al., 2006 (Hsu H., 1983; Yü, 1994)</p>                                                                                                                                                                                                                                                                                                                                                                                                                                                                                                                                                                                                                                                                                                                                                                                            |
| 10               | <p>On the basis of additional descriptive texts, it seems to have occurred as a storm surge.</p> <p>Tainan: winds, rainstorms and earthquakes. Sea rose, ships and houses damaged. Thousands of deaths. Possibly referring to 1721-1-5 event. An earthquake occurred in the month but no tsunami was mentioned.</p> <p>Strange wind and rainstorm, sea rose, ships collided; earthquake occurred, damaged houses. Thousands of deaths. Earthquake and sea rose.</p> <p>Tainan: unusual wind and rainstorm, thousands of deaths.</p>                                                                                                                                                                                                                                                                                                                                                                                                                                                  | <p>Zhou and Adams, 1986</p> <p>Yang, 1987 (Zhou and Adams, 1986)</p> <p>Lee, 1988 (Chinese Academy of Sciences, 1956; Zhou and Adams, 1986)</p> <p>Li et al., 2006 (Yang, 1987; Zheng and Yeh, 1989; Bao et al., 1991)</p> <p>Mak and Chan, 2007 (&lt;Dynasty Ming and Ching history&gt;; &lt;Taiwan record&gt;; Fang, 1969; First Archive of China, 1996)</p> <p>NGDC database (Gu et al., 1989)</p>                                                                                                                                                                                                                                                                                                                                                                                                                                                                                                                         |
| 11               | <p>Many houses destroyed by tsunami.</p> <p>Quoted Yang (1987). There may be more data in other government records to verify this tsunami.</p>                                                                                                                                                                                                                                                                                                                                                                                                                                                                                                                                                                                                                                                                                                                                                                                                                                       | <p>Soloviev and Go, 1974 (Hsu, 1971)</p> <p>Yang, 1987 (Soloviev and Go, 1974; Iida, 1984)</p> <p>Li et al., 2006 (Yang, 1987; Bao et al., 1991)</p> <p>NGDC database (Soloviev and Go, 1974)</p> <p>NTL database (Soloviev and Go, 1974)</p>                                                                                                                                                                                                                                                                                                                                                                                                                                                                                                                                                                                                                                                                                 |
| 12               | <p>Sea suddenly rose, swept 10000 people. No quake mentioned, possibly meteorological.</p> <p>The sea suddenly rose 9 m (30 feet) near Canton and swept away 10000 inhabitants. No earthquake was reported.</p> <p>9 m high (?) waves. Sea suddenly rose and washed away 10000 people. No earthquake. Probably meteorological origin.</p> <p>Near Guangzhou: Sea rose 9 m, swept 10000 people. No earthquake. (Probably same incident as 1765 or 1767-11-22)</p> <p>Tide of 30 feet at neighbourhood of Guangdong, swept away 4000 houses and 10000 people.</p> <p>Guangzhou: 9 m high waves, swept away 10000 people. Probably meteorological.</p>                                                                                                                                                                                                                                                                                                                                  | <p>Iida et al., 1967 (Mallet, 1854)</p> <p>Berninghausen, 1969 (Mallet and Mallet, 1858)</p> <p>Soloviev and Go, 1974 (Mallet, 1954; Iida et al., 1967; Berninghausen, 1969)</p> <p>Lee, 1988 (Heck, 1947; Berninghausen, 1969; NGDC &amp; WDC-A, 1984)</p> <p>Mak and Chan, 2007 (The Annual Register, 1766; Mallet and Mallet, 1858; National Palace Museum, 1982a)</p> <p>NGDC database (Mallet and Mallet, 1858; Iida et al., 1967; Soloviev and Go, 1974; Iida, 1984)</p> <p>NTL database (Soloviev and Go, 1974)</p>                                                                                                                                                                                                                                                                                                                                                                                                    |

| Event Number (#) | Date of event (Time)                      | Tsunami Location                      | Lat. /Long.  | Cause        | Source location (Lat. /Long.)                                          | Assigned validity in existing database | Tsu. Int. 1 | Tsu. Int. 2 | Max. water height (m) |
|------------------|-------------------------------------------|---------------------------------------|--------------|--------------|------------------------------------------------------------------------|----------------------------------------|-------------|-------------|-----------------------|
| 13               | 1765-11-22                                | Macau                                 | 22.12/113.33 | E            |                                                                        |                                        |             |             |                       |
|                  | 1767-11-22 (21:50)                        | Macau                                 |              | E            |                                                                        |                                        |             |             |                       |
|                  | 1765-11-22 (or year 1767 as in NGDC 1984) | Macau                                 |              | E            | Macau                                                                  |                                        |             |             |                       |
|                  | 1767-11-22                                | Macau (Guangdong)                     | 22/113.30    | E (7)        |                                                                        | Did not pass validation                |             |             |                       |
|                  | 1767-11-22                                |                                       |              | E            | South China Sea                                                        | 2 [questionable]                       |             |             |                       |
|                  | 1767-11-22                                | Macau                                 |              | T            | Macau, South China Sea (22/113.3)                                      | 2 [questionable]                       | 1           |             |                       |
| 14               | 1781-5-22                                 |                                       |              |              | Taiwan, Taiwan strait                                                  | 3 [probably tsunami]                   |             | 1           | >30                   |
|                  | 1781-4-24~6-21                            | Pingtung (Taiwan)                     |              | E (6.4)      | (‘Possible’) Distant earthquake                                        |                                        |             | 2           | >30                   |
|                  | 1781-4-5                                  | Kaohsiung                             |              |              |                                                                        |                                        |             |             |                       |
|                  | 1781-4~6                                  | Kaohsiung (Taiwan)                    | 24/121       |              |                                                                        | True                                   |             |             | >30                   |
| 15               | 1782-5-22                                 | Taiwan Strait coasts (Taiwan & China) |              |              |                                                                        | ? [Possible]                           |             |             |                       |
|                  | 1782-5-22                                 | Taiwan                                |              | E            |                                                                        |                                        |             |             |                       |
|                  | 1782-5-22                                 | Kaohsiung (Taiwan)                    | 24/121       | E (7)        |                                                                        | Possible tsunami but erroneous report  |             |             |                       |
|                  | 1782-5-22                                 |                                       |              | E (7)        | South China Sea                                                        | 2 [questionable]                       | 2.50        |             |                       |
|                  | 1782-5-22                                 | Taiwan                                |              | T and L      | Taiwan, South China Sea (24/121)                                       | 3 [probable]                           | 3           |             | 10                    |
| 16               | 1792-8-9                                  |                                       |              | E (6.75)     | Chiayi (23.6/120.5)                                                    |                                        |             |             |                       |
|                  | 1792-8-9                                  |                                       |              | E (6.75)     | Chiayi (23.6/121.7)                                                    |                                        |             |             |                       |
|                  | 1792-8-9                                  | An-ping (Tainan)                      |              | E (6.75)     | Earthquake reported in Tainan, Fengshan, Chiayi, Zhanghua (23.6/120.5) |                                        |             |             |                       |
|                  | 1792-8-9                                  | Tainan (Taiwan)                       |              | E (6.75/7.1) | (‘Possible’) Yunlin/ Chiayi                                            |                                        |             | 2           |                       |
|                  | 1792-8-9                                  | Luerhmen (Tainan)                     |              | E (7)        | Chiayi (23.6/120.6)                                                    |                                        |             |             |                       |
|                  | 1792-8-9                                  | Changhua (Taiwan)                     |              | E            |                                                                        |                                        |             |             |                       |
|                  | 1792-8-9                                  | Zhanghua, Chiayi (Taiwan)             |              | E (6.75)     | Chiayi (23.6/120.5)                                                    |                                        |             |             |                       |
|                  | 1792-8-9                                  | Tainan (Taiwan)                       | 23.6/120.6   | E (7)        |                                                                        | Did not pass validation                |             |             |                       |
| 17               | 1792-8-9                                  |                                       |              | E (6)        | Tainan (23.6/120.5)                                                    | 2 [questionable]                       |             |             | >10                   |
|                  | 1853-10-29                                | East coast of Taiwan                  |              | V            |                                                                        |                                        |             |             |                       |
| 18               | 1853-10-29                                |                                       |              | U            | E. Taiwan-Ryukyu Islands (24/121.83)                                   | -1 [erroneous entry]                   |             |             |                       |
|                  | 1862-6-6                                  |                                       |              | T            | Chiayi (24/121)                                                        | 1 [very doubtful]                      |             |             |                       |
| 19               | <sup>9</sup> 1866-6-11                    | Kaohsiung                             |              |              |                                                                        |                                        |             |             |                       |
| 20               | 1866-12-16                                | Kaohsiung                             |              | E (6.4)      | (‘Possible’) Distant earthquake                                        |                                        |             | 0           |                       |
|                  | <sup>9</sup> 1866-12-16                   | Kaohsiung                             |              |              |                                                                        |                                        |             |             |                       |

| Event Number (#)                         | Reported observation/ highlights                                                                                                                                                                                         | References                                                                                                                                       |
|------------------------------------------|--------------------------------------------------------------------------------------------------------------------------------------------------------------------------------------------------------------------------|--------------------------------------------------------------------------------------------------------------------------------------------------|
| 13                                       | Local shock, the ships in harbour shook and whirled about, and those on board imagined at first that it had been a whirlwind. Possibly the same as 1765-5.                                                               | Berninghausen, 1969 (De Visme, 1809)                                                                                                             |
|                                          | Terrible earthquake at Macau. A ship in bay was shaken and spun, while wind was light. Cox and Berninghausen think this is the same incident as 1765-5.                                                                  | Soloviev and Go, 1974 (de Visme, 1769; Berninghausen, 1969; Cox, 1970)                                                                           |
|                                          | Ships shook and whirled about. (Probably same incident as 1765-5)                                                                                                                                                        | Lee, 1988 (Heck, 1947; Berninghausen, 1969; NGDC & WDC-A, 1984)                                                                                  |
|                                          | Ships in harbor were shaken and whirled about. Some referred this event to 1765 event.                                                                                                                                   | Mak and Chan, 2007 (de Visme, 1769; Iida et al., 1967; Berninghausen, 1969; Cox, 1970)                                                           |
|                                          |                                                                                                                                                                                                                          | NGDC database (Soloviev and Go, 1974)                                                                                                            |
|                                          |                                                                                                                                                                                                                          | NTL database (Lockridge and Dunbar, 1996)                                                                                                        |
| 14                                       | Weather was fine, suddenly sea roared with wave of >30 m, and ebbed. Taiwan Strait earthquake, tsunami lasted 1-8 hrs, >50000 people died.                                                                               | Yang, 1987 (Chen et al., 1830; Soloviev and Go, 1974; Lu, 1984; Iida, 1984; NGDC & WDC-A, 1984; Zhou and Adams, 1986) <sup>8</sup>               |
|                                          | Weather was fine, suddenly sea roared with wave of >30 m, and ebbed. Houses submerged, one woman died.                                                                                                                   | Yü, 1994 (Chen et al., 1830; Hsu H., 1983)                                                                                                       |
|                                          | Great contrast in death toll between reports of Soloviev & Go (1974) and Yang (1987). No record in Guangdong and Fujian data but they would be affected if the tsunami was generated by far field earthquake.            | Li et al., 2006 (Soloviev and Go, 1974; Hsu H., 1983; Yang, 1987; Bao et al., 1991; Hatori, 1994; Ma et al., 1994)                               |
|                                          | Weather was fine, suddenly sea roared with wave of >30 m, and ebbed. Houses submerged, one woman died.                                                                                                                   | Mak and Chan, 2007 (Chen et al., 1830)                                                                                                           |
| 15                                       | Sea rose with violence, remained high 1 or 8 hrs (?). Drowned immense numbers. No quake, possibly meteorological.                                                                                                        | Iida et al., 1967 (Mallet, 1854)                                                                                                                 |
|                                          | Earthquake affected whole island. Tsunami waves ran in E-W direction. 'Almost the entire island was flooded for a distance more than 120 km (30 leagues)'. >40000 deaths                                                 | Soloviev and Go, 1974 (Perrey, 1862a; Mallet, 1854; Iida et al., 1967; Cox, 1970)                                                                |
|                                          | Taiwan: earthquake, flood extended 120 km for inland, 40000 casualties.                                                                                                                                                  | Mak and Chan, 2007 (Mallet and Mallet, 1858; Perrey, 1862a; Soloviev et al., 1974; National Palace Museum, 1982b; Yang, 1987; Bryant, 2001)      |
|                                          | Sea rose, remained high '1 or 8 hrs'. Almost flooded entire island. More than 40000 deaths.                                                                                                                              | NGDC database (Iida et al., 1967; Soloviev and Go, 1975; Massey, 2006)                                                                           |
|                                          |                                                                                                                                                                                                                          | NTL database (Soloviev and Go, 1974)                                                                                                             |
| 16                                       | 'Water was uplifted several meters without wind, the field slumped down and water flooded in lower' (Gu et al., 1983)                                                                                                    | Zhou and Adams, 1986 (Gu et al., 1983)                                                                                                           |
|                                          |                                                                                                                                                                                                                          | Yang, 1987 (Zhou and Adams, 1986)                                                                                                                |
|                                          | Although earthquake was not very strong, water was lifted several meters under calm conditions.                                                                                                                          | Lee, 1988 (Chinese Academy of Sciences, 1956; Zhou and Adams, 1986)                                                                              |
|                                          | 'Ships at Luermen were always swung in the month due to earthquake. When there was no wind, wave rose to a few 'zhangs'.' (Hsu H., 1983)                                                                                 | Yü 1994 (Lee et al., 1976; Hsu H., 1983; Hsu M.T., 1983; Tsai, 1985)                                                                             |
|                                          | Tainan: No wind but high wave. Big ships in sea were swung.                                                                                                                                                              | Wang et al., 2005 (Xie et al., 1982-1988)                                                                                                        |
|                                          | In 'typhoon and flood' section in Hsu H. (1983), it was noted farmlands at several Changhua towns were flooded in the year. This can be referring to the same event at Luermen (wave rose to a few zhangs when no wind). | Li et al., 2006 (<Changhua county report>; <Taiwan record of tax and labour>; Hsu H., 1983; Yang, 1987; Zheng and Yeh, 1989; Bao et al., 1991)   |
|                                          | Zhanghua: Nantou and Beitou flooded with seismic water; Chiayi: water shoot up tens of feet, waves bombarding the coast.                                                                                                 | Wong and Chan, 2006                                                                                                                              |
|                                          | Earthquake, agitated sea seen in harbor, ships shaken. / But no condition of the sea was reported by 'The State Archives Administration of the PRC 1959'.                                                                | Mak and Chan, 2007 (Chen et al., 1830; The State Archives Administration of the PRC, 1959; Chen, 1968; National Earthquake Administration, 1995) |
| Luermen: water surged up tens of meters. | NGDC database (Gu et al., 1989)                                                                                                                                                                                          |                                                                                                                                                  |
| 17                                       | Underwater eruption. Sea was agitated and churned so heavily.                                                                                                                                                            | Soloviev and Go, 1974 (Perrey, 1859; 1862b; 1864)                                                                                                |
|                                          | Sea in a strong commotion as a result of volcanic activity.                                                                                                                                                              | NGDC database (Iida, 1984; Soloviev and Go, 1974; Kuno, 1962)                                                                                    |
| 18                                       |                                                                                                                                                                                                                          | NTL database (Dunbar et al., 1992)                                                                                                               |
| 19                                       |                                                                                                                                                                                                                          | Li et al., 2006 (Yü, 1994)                                                                                                                       |
| 20                                       | 'After an earthquake, boats in harbor were swung, river water fell and suddenly rose, flooding seemed to occur soon' (Hsu H., 1983). 'Sea water rushed on land violently, sweeping away houses at coast' (Tsai, 1985).   | Yü, 1994 (Álvarez, 1955; Lee et al., 1976; Hsu, 1981; Hsu H., 1983; Hsu M.T., 1983; Tsai, 1985)                                                  |
|                                          | Quoted Yü (1994). Zheng and Yeh (1989) pointed out the affected area is at Kaohsiung.                                                                                                                                    | Li et al., 2006 (Álvarez, 1955; Hsu H., 1983; Yü, 1994; Zheng and Yeh, 1989)                                                                     |

| Event Number (#)  | Date of event (Time)    | Tsunami Location      | Lat. /Long.  | Cause                       | Source location (Lat. /Long.)      | Assigned validity in existing database | Tsu. Int. 1 | Tsu. Int. 2 | Max. water height (m) |
|-------------------|-------------------------|-----------------------|--------------|-----------------------------|------------------------------------|----------------------------------------|-------------|-------------|-----------------------|
| 21                | <sup>9</sup> 1867-6-11  | Keelung               |              |                             |                                    |                                        |             |             |                       |
| 22                | <u>1867-12-18</u>       | Keelung               |              |                             |                                    | * [Valid]                              |             |             |                       |
|                   | 1867-12-18              | Keelung (Taiwan)      | 25.09/121.46 | E                           |                                    |                                        |             |             |                       |
|                   | 1867-12-18 morning      | Keelung               |              | E                           |                                    |                                        |             |             |                       |
|                   | 1867-12-18              | Keelung               |              |                             |                                    |                                        |             |             |                       |
|                   | 1867-12-18              |                       |              | E (6)                       | Keelung (25.5/121.7)               |                                        |             |             |                       |
|                   | 1867-12-18              |                       |              | E (7)                       | Keelung (25.5/121.7)               | 4 [tsunami]                            |             | 2           |                       |
|                   | 1867-12-18              | Keelung               |              | E (6/ 7)                    | (Possible)Keelung                  |                                        |             | 2           |                       |
|                   | 1867-12-18              | Keelung               |              |                             | Keelung                            |                                        |             |             | 7.5                   |
|                   | <sup>9</sup> 1867-12-18 | Keelung               |              | E (7)                       |                                    |                                        |             |             |                       |
|                   | 1867-12-18              | Near Danshui (Taiwan) |              | E                           | Keelung (25.5/121.7)               |                                        |             |             |                       |
|                   | <u>1867-12-18</u>       |                       |              | E (6)                       | East China Sea (25.5/121.7)        | 4 [definite]                           | 2.00        |             |                       |
| <u>1867-12-18</u> | Keelung                 |                       | T            | Keelung (25.1/121.4)        | 4 [definite]                       | 2                                      |             |             |                       |
| 23                | 1882                    | China                 |              | E                           | Kansuh (Kanchau) <sup>10</sup>     |                                        |             |             |                       |
|                   | <u>1882-12-9</u>        |                       |              | U                           | South China Sea (24.5/120.5)       | -1 [erroneous entry]                   |             |             |                       |
| 24                | 1903-9-7 (23:00)        | Taiwan Island         |              | E                           |                                    |                                        |             |             |                       |
|                   | 1903-9-7                |                       |              | E                           | Taiwan                             | 1 [very doubtful]                      |             |             |                       |
|                   | 1903-9-7                |                       |              | T                           | Taiwan (24/121)                    | 1 [very doubtful]                      |             |             |                       |
| 25                | <u>1917-1-25</u>        | Tongan (Fujian)       |              | E                           | Near Xiamen                        | * [Valid]                              |             |             |                       |
|                   | 1917-1-25               | Tongan (Fujian)       | 24.44/118.09 |                             |                                    |                                        |             |             |                       |
|                   | 1917-1-25               | Tongan                |              | E                           | Coast of Taiwan Strait             |                                        |             |             |                       |
|                   | 1917-1-25               | Tongan                |              |                             |                                    |                                        |             |             |                       |
|                   | 1917-1-25               |                       |              | E (6.5)                     | Xiamen, Tongan (24.5/119.5)        | 4 [tsunami]                            |             | 1           |                       |
|                   | 1917-1-25               | Tongan (Fujian)       |              | E                           | (24.3/118)                         |                                        |             |             | 2-5.9                 |
|                   | 1917-1-25               | Tongan (Fujian)       |              | E (6.5)                     | (24.5/119.5)                       |                                        |             |             |                       |
|                   | 1917-1-25               | Tongan (Fujian)       | 24.3/118     | E (6.5)                     |                                    | Possible tsunami but erroneous report  |             |             |                       |
|                   | <u>1917-1-25</u>        |                       |              | E (6.5)                     | South China Sea (24.5/119.5)       | 4 [definite]                           | 1.00        |             |                       |
| <u>1917-1-25</u>  | Tongan (Fujian)         |                       | T            | East China Sea (23.2/121.6) | 4 [definite]                       | -0.5                                   |             | 0.5         |                       |
| 26                | 1917-5-6                | Keelung               |              | E (5.8)                     | (23.2/121.6)                       | * [Valid]                              |             |             | 0.5                   |
|                   | 1917-5-6 (21:19)        | E Taiwan, Keelung     |              |                             |                                    |                                        |             |             | 0.5                   |
|                   | 1917-5-6 (21:19)        |                       |              | E (5.8)                     | Taiwan, Taiwan strait (23.2/121.6) | 4 [tsunami]                            |             | -1          | 1                     |
|                   | 1918-3-27               | Keelung               |              | E (6.4)                     | Su-ao                              |                                        |             | 2           |                       |
|                   | 1917-5-6                | Eastern Taiwan        |              | E (5.8)                     | (23.2/121.6)                       |                                        |             |             | 3.7                   |
|                   | <u>1917-5-6 (12:19)</u> |                       |              | E (5.8)                     | Taiwan (23.2/121.6)                | 4 [definite]                           | -0.50       |             | 0.5                   |
|                   | <u>1917-5-6 (12:19)</u> | Keelung               | 25.15/121.75 | T                           | South China Sea (24.5/118)         | 4 [definite]                           | 1           |             |                       |

| Event Number (#) | Reported observation/ highlights                                                                                                                                                                                                                                                                | References                                                                                                                                                                                                                                           |
|------------------|-------------------------------------------------------------------------------------------------------------------------------------------------------------------------------------------------------------------------------------------------------------------------------------------------|------------------------------------------------------------------------------------------------------------------------------------------------------------------------------------------------------------------------------------------------------|
| 21               |                                                                                                                                                                                                                                                                                                 | Li et al., 2006 (Hsu, 1981; Bao et al., 1991; Yü, 1994)                                                                                                                                                                                              |
| 22               | Water ran out of harbour after quake. Swept into town. 100 dead.                                                                                                                                                                                                                                | Iida et al., 1967 (Siebery, 1932; Heck, 1947; Musya, 1951; Iida, 1956; Keimatsu, 1963; Kawasumi, 1963)                                                                                                                                               |
|                  | Destructive shock reported from the northern end of island. 'At Keelung the whole harbour was left dry for a few moments and the water returning in one vast wave rushed into the town itself.'                                                                                                 | Berninghausen, 1969 (Holt, 1868; Omori, 1907; Taihoku Meteorological Observatory, 1914; Keimatsu, 1963)                                                                                                                                              |
|                  | Earthquake at N Taiwan. Water left Keelung harbour, exposing bottom. Some boats sank, some were tossed into flooded city. Fish was washed ashore.                                                                                                                                               | Soloviev and Go, 1974 (Holt, 1868; Fuchs, 1869; Perrey, 1870, 1872, 1873; Omori, 1907, 1919; Anonymous, 1914; Sieberg, 1932; Heck, 1947; Musya, 1951; Iida, 1956; Keimatsu, 1963; Ponyavin, 1965; Iida et al., 1967; Berninghausen, 1969; Hsu, 1971) |
|                  | Keelung: Earthquake with tsunami. Houses destroyed all over the city. Hot water flowed out of volcano nearby. Quite a lot of deaths.                                                                                                                                                            | Li, 1981 (<Japanese Earthquake Historical Data>)                                                                                                                                                                                                     |
|                  |                                                                                                                                                                                                                                                                                                 | Zhou and Adams, 1986                                                                                                                                                                                                                                 |
|                  | Many 'ship houses' destroyed after earthquake, a few hundreds died.                                                                                                                                                                                                                             | Yang, 1987 (Soloviev and Go, 1974; Iida, 1984; Zhou and Adams, 1986)                                                                                                                                                                                 |
|                  | Whole Keelung damaged after earthquake. When sea water ebbed, ships were found on beach. Soon after, water returned and cleared the beach.                                                                                                                                                      | Yü, 1994 (Hsu H., 1983)                                                                                                                                                                                                                              |
|                  | Earthquake, tsunami and marine volcano eruption. Keelung: ships sank, houses damaged. A few hundreds drowned at Taipei, Keelung, Yilan, Hualien.                                                                                                                                                | Wang et al., 2005 (Liu, 1989)                                                                                                                                                                                                                        |
|                  | 'Seawater ebbed, ships were left on beach; soon the flood comes again violently, brought away ships, and everything on the beach are gone' (Álvarez, 1955). There is no doubt about this tsunami.                                                                                               | Li et al., 2006 (Álvarez, 1955; Keimatsu, 1963; Soloviev and Go, 1974; Li, 1981; Hsu, 1981; Hsu H., 1983; Yang, 1987; Zheng and Yeh, 1989; Bao et al., 1991)                                                                                         |
|                  | Sea flooding, hundreds of people drown.<br>Keelung: boats sank or tossed into city, city flooded. One hundred to several hundreds killed.                                                                                                                                                       | Wong and Chen, 2006<br>NGDC database (Iida et al., 1967; Soloviev and Go, 1974; Iida, 1984)<br>NTL database (Soloviev and Go, 1974)                                                                                                                  |
| 23               | Destructive shocks in Kansuh (Kanchau) *cannot be located* were followed by an inundation.                                                                                                                                                                                                      | Berninghausen, 1969 (Anonymous, 1882)<br>NGDC database (Cox et al., 1974; Iida, 1984)                                                                                                                                                                |
| 24               | Earthquake and tidal waves.                                                                                                                                                                                                                                                                     | Soloviev and Go, 1974 (Rudolph, 1905)                                                                                                                                                                                                                |
|                  | Taiwan island: tidal waves. Probably storm surge.                                                                                                                                                                                                                                               | NGDC database (Soloviev and Go, 1974; Iida, 1984)<br>NTL database (Soloviev and Go, 1974)                                                                                                                                                            |
|                  |                                                                                                                                                                                                                                                                                                 |                                                                                                                                                                                                                                                      |
| 25               | Waters following earthquake sank many fishing boats.                                                                                                                                                                                                                                            | Iida et al., 1967 (Keimatsu, 1963)                                                                                                                                                                                                                   |
|                  | Tsunami reported from Tongan.                                                                                                                                                                                                                                                                   | Berninghausen, 1969 (Keimatsu, 1963)                                                                                                                                                                                                                 |
|                  | Strong earthquake, then unusual ebb tide followed by a flood tide. Many fishing boats damaged.                                                                                                                                                                                                  | Soloviev and Go, 1974 ('Chronicle of Tongan'; Keimatsu, 1963; Iida et al., 1967; Berninghausen, 1969)                                                                                                                                                |
|                  | Strong earthquake, tide ebbed and rose, most fishing boats sank.                                                                                                                                                                                                                                | Li, 1981 (<Tongan county report of 1929>)                                                                                                                                                                                                            |
|                  | Earthquake, then sea ebbed then flooded. Fishing boats sank.                                                                                                                                                                                                                                    | Yang, 1987 (Soloviev and Go, 1974; Lu, 1984; Iida, 1984)                                                                                                                                                                                             |
|                  | Strong earthquake occurred and tsunami reported. Tongan: unusual ebb tide then flood tide, sank many boats.                                                                                                                                                                                     | Lee, 1988 (NGDC & WDC-A, 1984; Chinese Academy of Sciences, 1956)                                                                                                                                                                                    |
|                  | Quoted Li (1981). The tsunami affected Fujian but there is no record at Taiwan at all.                                                                                                                                                                                                          | Li et al., 2006 (Li, 1981; Yang, 1987; Bao et al., 1991; Li, 1991)                                                                                                                                                                                   |
|                  | Earthquake, then sea ebbed and flooded. Fishing boats sank.                                                                                                                                                                                                                                     | Mak and Chan, 2007 (<Tongan record in period of Republic of China>; Keimatsu, 1963)                                                                                                                                                                  |
|                  | Tongan, Fujian: unusual ebb tide then flood tide, fishing boats damaged.                                                                                                                                                                                                                        | NGDC database (Soloviev and Go, 1974; Iida, 1984)<br>NTL database (Soloviev and Go, 1974)                                                                                                                                                            |
| 26               |                                                                                                                                                                                                                                                                                                 | Iida et al., 1967 (Imamura and Moriya, 1939; Imamura, 1949; Iida, 1963)                                                                                                                                                                              |
|                  | Earthquake and tsunami on E coast of Taiwan. Keelung: wave from 02:00-16:00.                                                                                                                                                                                                                    | Soloviev and Go, 1974 (Imamura and Moriya, 1939; Imamura, 1942, 1949; Takahasi, 1951; Iida, 1956, 1963a, 1963b; Anonymous, 1961; Ponyavin, 1956; Iida et al., 1967)                                                                                  |
|                  | Keelung: 1m-high tsunami.                                                                                                                                                                                                                                                                       | Yang, 1987                                                                                                                                                                                                                                           |
|                  | Some reports marked day of tsunami as 1917-5-6 or 1918-5-1, but Zheng et al. (1989) found that 'the only hazardous earthquake within these two years' occurred on this day (1918-3-27).                                                                                                         | Yü, 1994 (Zheng and Yeh, 1989)                                                                                                                                                                                                                       |
|                  | 'The tsunami is reported in previous publications but no such record is found in neither TW or Japanese earthquake catalogues.' (Hsu, 1981). 'According to a Japanese research, a tsunami has hit TW in year 1917, with waveheight of 3.7 m. Other damages are not known.' (United Daily, 1960) | Li et al., 2006 (United Daily, 1960; Hsu, 1981; Yang, 1987; Zheng and Yeh, 1989; Bao et al., 1991)                                                                                                                                                   |
|                  | Tsunami on east coast of Taiwan. Keelung: waves from 0200-1600.                                                                                                                                                                                                                                 | NGDC database (Soloviev and Go, 1974)<br>NTL database (Soloviev and Go, 1974)                                                                                                                                                                        |
|                  |                                                                                                                                                                                                                                                                                                 |                                                                                                                                                                                                                                                      |



| Event Number (#)       | Date of event (Time)   | Tsunami Location                    | Lat. /Long.                  | Cause                   | Source location (Lat. /Long.)          | Assigned validity in existing database | Tsu. Int. 1 | Tsu. Int. 2 | Max. water height (m) |
|------------------------|------------------------|-------------------------------------|------------------------------|-------------------------|----------------------------------------|----------------------------------------|-------------|-------------|-----------------------|
| 27                     | 1917-7-4 (08:38)       |                                     |                              | E (7.3)                 | Eastern sea of Keelung (25/123)        |                                        |             |             | 3.7                   |
| 28                     | 1918-2-13 (14:07:13)   |                                     |                              | E (7.3)                 | Shantou, Nanao (24/117)                |                                        |             |             |                       |
|                        | 1918-2-13 (14:07)      |                                     |                              | E (7.3)                 | Shantou, Nanao (24/117)                | 4 [tsunami]                            |             | 1           |                       |
|                        | 1918-2-13              | Guangdong, Fujian                   |                              | E (7.25)                | Near Shantou and Nan-ao (24/116.5)     |                                        |             |             |                       |
|                        | 1918-2-13 (14:07)      | Tongan, Shantou (Fujian, Guangdong) |                              | E (7.3)                 | Sea near Nanao (23.6/117.3)            |                                        |             |             |                       |
|                        | 1918-2-13              | Shantou (Guangdong)                 |                              | E (7.3)                 | Near Nanao (24/117)                    |                                        |             |             | 7.5                   |
|                        | 1918-2-13              | Shantou, Fengshun                   |                              | E (7.3)                 | Nan'ao (23.5/117)                      |                                        |             |             |                       |
|                        | 1918-2-13 (06:07)      | Nanao (Shantou Guangdong)           | 23.5/117.2                   | E (6.5)                 |                                        | Possible tsunami but erroneous report  |             |             |                       |
|                        | 1918-2-13 (06:07:13)   |                                     |                              | E (7.5) and L           | Guangdong (23.5/117.2)                 | 4 [definite]                           | -1.00       |             |                       |
| 1918-2-13 (06:07:12.3) |                        |                                     | T                            | S. China (23.57/117.32) | 4 [definite]                           |                                        |             |             |                       |
| 29                     | 1918-5-1               | Keelung                             |                              |                         |                                        |                                        |             |             | 3.7                   |
| 30                     | 1921-9                 | Tainan                              |                              |                         |                                        |                                        |             |             |                       |
| 31                     | 1922-9-1 (19:16:06)    | Fujian                              |                              | E (7.6)                 | Taiwan (24.5/122)                      | 1 [very doubtful]                      |             |             |                       |
|                        | 1922-9-1 (19:16:8.2)   |                                     |                              | T                       | Taiwan (24.38/122.08)                  | 0 [false entry]                        |             |             |                       |
| 32                     | 1922-11-12             | Keelung                             |                              | E (8.3)                 | Chile (-28.5/-70)                      | * [Valid]                              |             |             |                       |
| 33                     | 1951-10-22             | Hualien                             |                              | E (7.3)                 | Hualien                                |                                        |             | -1          |                       |
|                        | 1951-10-22             | Northeastern sea of Taiwan          |                              | E (7.3)                 | E of Hualien (23.8/121.7)              |                                        |             |             |                       |
|                        | 1951-10-22 (05:42:01)  |                                     |                              | E (7.3)                 | Taiwan (23.8/121.7)                    | 4 [definite]                           |             |             | 0.3                   |
| 34                     | 1952-11-5              | Hong Kong                           |                              | E (8.2)                 | Kamchatka                              |                                        |             |             | 0.15                  |
| 35                     | 1960-5-24              | Hong Kong                           |                              | E (8.5)                 | Chile                                  |                                        |             |             | 0.3                   |
|                        | 1960-5-24              | Keelung, Hong Kong                  |                              | E (8.25-8.5)            | S. Chile (-41/-73.5)                   | * [Valid]                              |             |             | 0.6/0.5               |
|                        | 1960-5-24              | Keelung, Hualien                    |                              | E (8.5)                 | Chile                                  |                                        |             | 0/-1        |                       |
|                        | 1960-5-24              | Hong Kong, Shanghai-Guangdong       |                              | E (8.9)                 | Chile                                  |                                        |             |             | 0.38/<br>0.15-0.2     |
|                        | 1960-5-24              | Keelung, Hualien                    |                              | E                       | Chile                                  |                                        |             |             | 0.66/ 0.3             |
| 36                     | 1963-2-13 (16:50)      | Hualien                             |                              | E (7.3)                 | (24.5/122.3)                           |                                        |             |             | 0.2                   |
|                        | 1963-2-13              | Eastern Taiwan                      |                              | E                       | (24.2/122.1) or (24.4/122.1)           |                                        |             |             |                       |
|                        | 1963-2-13 (08:50:04.5) |                                     |                              | E (7.3)                 | E. Taiwan-Ryukyu Islands (24.4/122.6)  | 4 [definite]                           | -2.00       |             | 0.2 or 0.4            |
|                        | 1963-2-13 (08:50:7.2)  | Pago Pago (American Samoa), Hualien | -14.27/-170.72, 23.98/121.62 | T                       | E. Taiwan-Ryukyu Islands (24.37/122.1) | 4 [definite]                           | -2          |             | 0.2                   |
| 37                     | 1963-10-13             | Hualien                             |                              | E (7)                   | Kuril Islands                          |                                        |             | -1          |                       |
|                        | 1963-10-13             | Hualien                             |                              | E (7)                   | Kuril Islands                          |                                        |             |             | >0.1                  |
| 38                     | 1964-3-28              | Hualien                             |                              | E (8.6)                 | Alaska                                 |                                        |             | -1          |                       |
|                        | 1964-3-28              | 'Coastal area' of China             |                              | E (8.4)                 | Alaska Bay                             |                                        |             |             | 0.1-0.3               |
|                        | 1964-3-28              | Hualien                             |                              | E (8.4)                 | Alaska (61/-147.5)                     |                                        |             |             |                       |

| Event Number (#) | Reported observation/ highlights                                                                                                   | References                                                                                                                        |
|------------------|------------------------------------------------------------------------------------------------------------------------------------|-----------------------------------------------------------------------------------------------------------------------------------|
| 27               |                                                                                                                                    | Wang et al., 2005                                                                                                                 |
| 28               | Caused extensive damage.                                                                                                           | Zhou and Adams, 1986                                                                                                              |
|                  |                                                                                                                                    | Yang, 1987 (Iida, 1984; Zhou and Adams, 1986)                                                                                     |
|                  | Region-wide earthquakes were reported. 'Certainly or probably tsunamigenic' (Zhou and Adams, 1986)                                 | Lee, 1988 (Zhou and Adams, 1986)                                                                                                  |
|                  | Tongan: Earthquake, tidal wave ebbed and rose, boats sank. Shantou: a ship touched sea bottom. Some mistakenly recorded 1917-1-25. | Wang et al., 2005 (Xie et al., 1982-1988)                                                                                         |
|                  | 'Tsunami of 7.5 m waveheight damaged 500 coastal houses, 50 ships and 250 deaths.' (Hai Tian, 1993)                                | Li et al., 2006 (Yang, 1987; Bao et al., 1991; Hai Tian, 1993)                                                                    |
|                  | Shantou: Roaring of seawater; Fengshun: tides turning white colour like rice soup.                                                 | Wong and Chan, 2006                                                                                                               |
|                  | Xiamen: a ship felt shock. Shantou: a ship touched bottom. Hong Kong, Xiamen & Shantou: tidal wave caused tremendous damage.       | Mak and Chan, 2007 (The China Mail 15th February, 1918; The China Mail 17th February, 1918)                                       |
|                  | Shantou: moderate tsunami, sea surged high.                                                                                        | NGDC database (Iida, 1984; Gu et al., 1989)                                                                                       |
|                  | NTL database (Iida, 1984)                                                                                                          |                                                                                                                                   |
| 29               | 'Tsunami of 3.7 m at NE TW' (Yang et al., 1983), but no >5M earthquake on the day (Zheng and Yeh, 1989).                           | Li et al., 2006 (Yang et al., 1983; Zheng and Yeh, 1989)                                                                          |
| 30               | Ma et al. (1994) mentioned a minor tsunami on the day, but data source is not presented.                                           | Li et al., 2006 (Ma et al., 1994)                                                                                                 |
| 31               | The shock off the coast of Yilan was felt in the whole island, the seashore of Fujian was also affected.                           | NGDC database (Gu et al., 1989)                                                                                                   |
|                  |                                                                                                                                    | NTL database (Dunbar et al., 1992)                                                                                                |
| 32               |                                                                                                                                    | Iida et al., 1967                                                                                                                 |
| 33               |                                                                                                                                    | Yü, 1994                                                                                                                          |
|                  | Earthquake at east of Hualien, tsunami of tens of cm was detected at Hualien.                                                      | Li et al., 2006 (Hsu, 1981; Zheng and Yeh, 1989)                                                                                  |
|                  | Series of shocks, tsunami reported at Tofino (Canada) and Hualienkang.                                                             | NGDC database (Wigen, 1983; Iida, 1984)                                                                                           |
| 34               | Maximum amplitude in Hong Kong: 6 inches (15 cm) from crest to trough.                                                             | Cheng, 1965                                                                                                                       |
| 35               | Maximum amplitude in Hong Kong: about 1'11" (58 cm) above and below predicted tide.                                                | Cheng, 1965                                                                                                                       |
|                  |                                                                                                                                    | Iida et al., 1967                                                                                                                 |
|                  |                                                                                                                                    | Yü, 1994                                                                                                                          |
|                  |                                                                                                                                    | Wang et al., 2005                                                                                                                 |
|                  | 'A wooden bridge at Keelung was damaged by driftwood, sea water was turbid.' (Hsu, 1981)                                           | Li et al., 2006 (United Daily, 1960; Central Daily, 1960; Hsu, 1964; Hsu, 1981)                                                   |
| 36               | Earthquake at north of Taiwan. Hualien: 20 cm.                                                                                     | Soloviev and Go, 1974 (Von Hake and Cloud, 1965; Iida et al., 1967)                                                               |
|                  | No death is recorded by Zheng and Yeh (1989) but 15 deaths are reported by Hatori (1994).                                          | Li et al., 2006 (Soloviev and Go, 1974; Usami, 1977; Iida, 1984; Yang, 1987; Zheng and Yeh, 1989; Bao et al., 1991; Hatori, 1994) |
|                  | Hualien: seismic sea wave of 20 cm or 16 inch (=40 cm).                                                                            | NGDC database (U.S. governmental departments, 1928-1983; Soloviev and Go, 1974; Iida, 1984; Lander et al., 1989)                  |
|                  |                                                                                                                                    | NTL database (Lander and Lockridge, 1989)                                                                                         |
| 37               |                                                                                                                                    | Yü, 1994                                                                                                                          |
|                  | 'Over 10 cm of tsunami mark seen at Hualien.' (Hsu, 1981)                                                                          | Li et al., 2006 (Hsu, 1964; Hsu, 1981)                                                                                            |
| 38               |                                                                                                                                    | Yü, 1994                                                                                                                          |
|                  |                                                                                                                                    | Wang et al., 2005                                                                                                                 |
|                  | 15 cm tsunami marked at Hualien tide gauge station.                                                                                | Li et al., 2006 (Hsu, 1964; Hsu, 1981)                                                                                            |

| Event Number (#) | Date of event (Time)           | Tsunami Location                                 | Lat. /Long.                           | Cause        | Source location (Lat. /Long.)         | Assigned validity in existing database | Tsu. Int. 1 | Tsu. Int. 2 | Max. water height (m) |
|------------------|--------------------------------|--------------------------------------------------|---------------------------------------|--------------|---------------------------------------|----------------------------------------|-------------|-------------|-----------------------|
| 39               | 1966-3-13                      | Ryukyu Islands, Kyushu Island (Japan)            |                                       | E (7.5)      | (24.2/122.6)                          |                                        |             |             |                       |
|                  | 1966-3-13 (00:31)              |                                                  |                                       | E (7.5)      | NE of Hualien (24.1/122.6)            | 4 [tsunami]                            |             | -1          |                       |
|                  | 1966-3-13                      | Eastern Taiwan                                   |                                       |              |                                       |                                        |             |             |                       |
|                  | <u>1966-3-12 (16:31:21.8)</u>  |                                                  |                                       | E (7.6)      | E Taiwan-Ryukyu Islands (22.5/122.3)  | 3 [probable]                           |             |             | 0.1                   |
|                  | <u>1966-3-12 (16:31:19.7)</u>  | Naha-Nagasaki (Japan)                            | 26.2089/<br>127.6786                  | T            | E Taiwan-Ryukyu Islands (24.31/122.7) | 4 [definite]                           | -3          |             | 0.1                   |
| 40               | 1972-1-25                      | Eastern Taiwan                                   |                                       | E            | (23.6/122.3) or (22.5/122.3)          |                                        |             |             |                       |
|                  | <u>1972-1-25 (02:06:23.3)</u>  |                                                  |                                       | E (7.5)      | E Taiwan-Ryukyu Islands (22.5/122.3)  | 4 [definite]                           | -2.00       |             | 0.05                  |
|                  | <u>1972-1-25 (02:06:21.4)</u>  | Malakal Harbour (Palau),<br>Ishigakijima (Japan) | 7.33/134.46,<br>24.3317/124.1558      | T            | Taitung (22.55/122.32)                | 4 [definite]                           | -3          |             | 0.1                   |
| 41               | <sup>9</sup> 1978-3-12         | Lanyu (Taitung Taiwan)                           |                                       |              |                                       |                                        |             |             |                       |
| 42               | <sup>9</sup> 1978-7-23         | Lanyu (Taitung Taiwan)                           |                                       | E (7.2)      | (22.3/121.5)                          |                                        |             |             |                       |
|                  | <u>1978-7-23 (14:42:36.9)</u>  |                                                  |                                       | E (7.4)      | Taiwan (22.282/121.512)               | 2 [questionable]                       | -1.00       |             | 0.05                  |
|                  | <u>1978-7-23 (14:42:36.9)</u>  | Ishigaki Island (Japan)                          | 24.3317/124.1558                      | T            | Taiwan (22.28/121.51)                 | 4 [definite]                           | -2          |             | 0.1                   |
| 43               | 1986-11-15 (05:20)             | Hualien, Yilan (Taiwan)                          |                                       | E (7.6)      | NE sea of Hualien (24.1/121.7)        |                                        |             |             |                       |
|                  | 1986-11-15                     | Hualien                                          |                                       | E (7.8)      | Eastern Taiwan (23.9/121.8)           |                                        |             |             | 2 or 0.13             |
|                  | <u>1986-11-14 (21:20:10.5)</u> |                                                  |                                       | E (7.8)      | Taiwan (23.901/121.574)               | 4 [definite]                           |             |             | 0.3                   |
|                  | <u>1986-11-14 (21:20:10.6)</u> |                                                  |                                       | T            | E of Hualien (23.9/121.57)            | 4 [definite]                           | -2          |             | 0.2                   |
| 44               | 1988-2-29                      | Xiamen (Fujian)                                  |                                       | E (7.5)      | N Pacific (55.1/167.5)                |                                        |             |             | 0.34                  |
| 45               | 1988-6-24                      | Hong Kong                                        |                                       | E (5.4)      | Luzon Strait (18.61/121.01)           |                                        |             |             | 0.28                  |
|                  | <u>1988-6-24 (02:06:26.3)</u>  | Hong Kong                                        |                                       | E (5.4)      | N of Luzon Island (18.606/121.013)    | 4 [definite]                           |             |             | 1.03                  |
| 46               | <u>1990-12-13 (19:50:17.8)</u> |                                                  |                                       | E (6.3)      | Taiwan (23.722/121.627)               | 4 [definite]                           |             |             | 0.04                  |
|                  | <u>1990-12-13 (19:50:17.9)</u> | Miyakokima, Ishigakijima (Japan)                 | 24.3317/124.1558,<br>24.8042/125.2808 | T            | Taiwan (23.72/121.63)                 | 4 [definite]                           |             |             |                       |
| 47               | 1993-8-8                       | Hualien, Changkang (Eastern Taiwan)              |                                       | E (8)        | Near Guam (12.98/144.8)               |                                        |             |             | 0.29/ 0.27            |
| 48               | 1994-9-16                      | Dongshan (Fujian), Penghu (Taiwan)               |                                       | E (6.4)      | Southern Taiwan Strait (22.5/118.7)   |                                        |             |             | 0.18/ 0.38            |
|                  | 1994-9-16                      | Penghu, Dongshan, Shantou                        |                                       | E (7.3)      | Taiwan Strait (22.53/118.71)          |                                        |             |             | 0.38/ 0.26/<br>0.47   |
| 49               | 1996-2-17                      | Taiwan                                           |                                       | E (8.1)      | Eastern Indonesia (-0.891/136.952)    |                                        |             |             | 0.55/ 0.25            |
| 50               | 1996-9-6                       | S of Lanyu                                       |                                       | E (7.07)     | S of Lanyu (22/121.36)                |                                        |             |             | 0.06/ 0.08/<br>0.22   |
| 51               | <u>1998-5-4</u>                | SE of Hualien                                    |                                       | E (7)        | SE of Hualien (23/122.72)             |                                        |             |             | 0.07                  |
|                  | <u>1998-5-3 (23:30:21.9)</u>   | Miyakojima, Ishigakijima and Okinawa (Japan)     |                                       | E (7.5)      | SE of Taiwan (22.306/125.308)         | 4 [definite]                           |             |             | 0.13                  |
| 52               | <u>1999-9-21</u>               | Sun Moon Lake                                    |                                       | E (7.3) or L | WSW of Sun Moon Lake (23.85/120.81)   |                                        |             |             | 0.21                  |
|                  | <u>1999-9-20 (17:47:18.5)</u>  |                                                  |                                       | T            | Taiwan (23.77/120.98)                 | 2 [questionable]                       | -5          |             |                       |

| Event Number (#) | Reported observation/ highlights                                                                                                                                                 | References                                                                                                                                                                              |
|------------------|----------------------------------------------------------------------------------------------------------------------------------------------------------------------------------|-----------------------------------------------------------------------------------------------------------------------------------------------------------------------------------------|
| 39               | Strong earthquake: 4 died on Taiwan, 2 died on Yonaguni Island. Very weak tsunami on Ryukyu Islands and Kyushu Island.                                                           | Soloviev and Go, 1974 (Tokunaga and Katsumata, 1971)                                                                                                                                    |
|                  | Moderate tsunami, 7 deaths.                                                                                                                                                      | Yang, 1987 (Iida, 1984)                                                                                                                                                                 |
|                  | 'Moderated tsunami, drowned 7 people' (Bao et al., 1991). Hatori (1994) marks the date of event on 1966-3-12, while Usami (1977) and Yang (1987) recorded it as on 1966-3-13.    | Li et al., 2006 (Usami, 1977; Yang, 1987; Zheng and Yeh, 1989; Bao et al., 1991; Hatori, 1994)                                                                                          |
|                  | Ryukyu Islands and western Kyushu Island: very weak tsunami.                                                                                                                     | NGDC database (Soloviev and Go, 1974; Iida, 1984)<br>NTL database (Iida, 1984)                                                                                                          |
| 40               | A minor tsunami recorded by Hatori (1994). Zheng and Yeh (1989) also reported an earthquake on this day. Tide gauge record can be checked to validate this tsunami.              | Li et al., 2006 (Zheng and Yeh 1989; Hatori 1994)                                                                                                                                       |
|                  | Weak tsunami after earthquake at Taiwan.                                                                                                                                         | NGDC database (Iida, 1984; Soloviev et al., 1992)                                                                                                                                       |
|                  |                                                                                                                                                                                  | NTL database (Iida, 1984)                                                                                                                                                               |
| 41               |                                                                                                                                                                                  | Li et al., 2006 (Lee, 1981; Hatori, 1994)                                                                                                                                               |
| 42               | Minor tsunami occurred after an earthquake.                                                                                                                                      | Li et al., 2006 (Lee, 1981; Zheng and Yeh, 1989; Hatori, 1994)<br>NGDC database (U.S. governmental departments, 1928-1983; Iida, 1984; NEIC, 1971-present)<br>NTL database (Iida, 1984) |
|                  |                                                                                                                                                                                  |                                                                                                                                                                                         |
|                  |                                                                                                                                                                                  |                                                                                                                                                                                         |
| 43               | 10 ships in harbour sank, 6 injured.                                                                                                                                             | Wang et al., 2005                                                                                                                                                                       |
|                  | Waveheight of 13 cm recorded at Taitung. 16 deaths at Japan (Hatori, 1994). 2 m waveheight at Hualien (Hsu, 1994).                                                               | Li et al., 2006 (Chen and Wang, 1988; Hsu and Chen, 1994; Chen, 1994; Hatori, 1994)                                                                                                     |
|                  |                                                                                                                                                                                  | NGDC database (Japan Meteorological Agency, 2007)                                                                                                                                       |
|                  |                                                                                                                                                                                  | NTL database                                                                                                                                                                            |
| 44               | Tsunami waves arrived Xiamen after an earthquake. The waves should have also affected TW.                                                                                        | Li et al., 2006 (Bao et al., 1991)                                                                                                                                                      |
| 45               | Tsunami height of 28 cm (above the normal tide level) recorded at Quarry Bay (Hong Kong).                                                                                        | Wong and Chan, 2006                                                                                                                                                                     |
|                  | Earthquake in Luzon generated a tsunami reported at Quarry Bay and Tai Po Kau of Hong Kong.                                                                                      | NGDC database (Lander et al., 2003)                                                                                                                                                     |
| 46               |                                                                                                                                                                                  | NGDC database (Lander et al., 2003; Japan Meteorological Agency, 2007)                                                                                                                  |
|                  |                                                                                                                                                                                  | NTL database                                                                                                                                                                            |
| 47               | Waveheights of 29 and 27 cm recorded at Hualien and Changkang respectively.                                                                                                      | Li et al., 2006 (Chen, 1994)                                                                                                                                                            |
| 48               | Waveheight of 18 cm recorded at Dongshan.                                                                                                                                        | Li et al., 2006                                                                                                                                                                         |
|                  | Tsunami amplitudes of 38, 26 and 47 cm (wave height from crest to trough) recorded at Penghu, Dongshan, Shantou respectively.                                                    | Wong and Chan, 2006                                                                                                                                                                     |
| 49               | Changkang: waveheight 55 cm (3 hrs 55 mins after earthquake); Keelung: waveheight 25 cm (4 hrs 1 min after earthquake).                                                          | Li et al., 2006 (Lin, 2006)                                                                                                                                                             |
| 50               | Waveheights of 6, 8 and 22cm recorded at Geng Fang, Su-ao and Changkang respectively.                                                                                            | Li et al., 2006 (Lin, 2006)                                                                                                                                                             |
| 51               | Waveheight of 7.4 cm detected at Lanyu, at 29 mins after the earthquake.                                                                                                         | Li et al., 2006 (Lin, 2006)                                                                                                                                                             |
|                  | Small tsunami observed. 4 cm high waves on Miyako-jima, 3cm on Ishigaki-jima and Naha, Okinawa.                                                                                  | NGDC database (NEIC, 1971-present; International Tsunami Information Center, 1999; Lander et al., 2003)                                                                                 |
| 52               | Disastrous earthquake on Taiwan. As the epicenter is inland, tsunami is not a result of submarine fault rupture. It could be generated by submarine landslide at Eastern Taiwan. | Li et al., 2006 (Lin, 2006)                                                                                                                                                             |
|                  |                                                                                                                                                                                  | NTL database (NGDC database)                                                                                                                                                            |

| Event Number (#) | Date of event (Time)           | Tsunami Location                     | Lat. /Long.                                         | Cause    | Source location (Lat. /Long.) | Assigned validity in existing database | Tsu. Int. 1 | Tsu. Int. 2 | Max. water height (m) |
|------------------|--------------------------------|--------------------------------------|-----------------------------------------------------|----------|-------------------------------|----------------------------------------|-------------|-------------|-----------------------|
| 53               | <u>1999-11-1 (17:53:0.1)</u>   |                                      |                                                     | T        | NE of Taiwan (23.38/121.52)   | 2 [questionable]                       | -5          |             |                       |
| 54               | 1999-11-27                     | Taipei County, Yilan                 |                                                     | E (7.1)  | Vanuatu (16.452/168.183)      |                                        |             |             | 0.38                  |
| 55               | <u>2001-12-18</u>              | Hualien                              |                                                     | E (6.7)  | E of Hualien (23.86/122.65)   |                                        |             |             | 0.14/ 0.16/ 0.1       |
|                  | <u>2001-12-18 (04:02:58.2)</u> |                                      |                                                     | E (6.8)  | Taiwan (23.954/122.734)       | 4 [definite]                           |             |             | 0.12                  |
| 56               | <u>2002-3-31</u>               | Hualien                              |                                                     | E (6.8)  | E of Hualien (24.13/122.19)   |                                        |             |             | 0.19-0.27             |
|                  | <u>2002-3-31 (06:52:50.4)</u>  |                                      |                                                     | E (7.1)  | Taiwan (24.279/122.179)       | 4 [definite]                           |             |             | 0.2                   |
|                  | <u>2002-3-31 (06:52:50.5)</u>  | Iriomote, Ishigaki, Yonaguni (Japan) | 24.3833/123.75,<br>24.3317/124.1558<br>24.45/122.95 | T        | NW of Taiwan (24.28/122.18)   | 4 [definite]                           | -3          |             | 0.2                   |
| 57               | 2002-12-10                     | Changkang (Taitung)                  |                                                     | E (6.42) | E of Changkang (23.1/121.34)  |                                        |             |             | 0.59                  |
| 58               | <u>2006-12-26 (12:26:21.4)</u> | China, Hong Kong                     |                                                     | E (7)    | Taiwan (21.799/120.547)       | 4 [definite]                           |             |             | 0.07                  |

| Event Number (#) | Reported observation/ highlights                                                                                                                                                  | References                                                                            |
|------------------|-----------------------------------------------------------------------------------------------------------------------------------------------------------------------------------|---------------------------------------------------------------------------------------|
| 53               |                                                                                                                                                                                   | NTL database (NGDC database)                                                          |
| 54               | Waveheights of 9-38 cm recorded at three coastal districts of Taipei county, and 11 cm recorded at Su-ao (Yilan).                                                                 | Li et al., 2006 (Lin, 2006)                                                           |
| 55               | Waveheights of 14.2, 16.2 and 10 cm recorded at Geng Fang, Su-ao and Hoping Harbour<br>20 cm on Iriomote-jima, 13 cm on Yonaguni-jima, 11 cm at Uehara and 5 cm on Ishigaki-jima. | Li et al., 2006 (Lin, 2006)<br>NGDC database (NEIC, 1971-present)                     |
| 56               | Waveheights of 18.5-27.3 cm detected in 5 stations at Eastern Taiwan.                                                                                                             | Li et al. 2006 (Lin, 2006)<br>NGDC database (Lander et al., 2003)<br><br>NTL database |
| 57               | Waveheights of 9.6-59.3 cm recorded in 9 stations at Eastern Taiwan.                                                                                                              | Li et al., 2006 (Lin, 2006)                                                           |
| 58               | 5-7 cm above normal tide level at China and Hong Kong SAR.                                                                                                                        | NGDC database (Yi et al., 2007)                                                       |

Remarks:

1. A '~' in 'date of event' represents 'to'. For example, 1661-1~2 means 'January to February of year 1661'.
2. Underlined dates and times are presented in Greenwich Mean Time (GMT), others are in local time (GMT+8).
3. Cause- E: Earthquake (Magnitude in bracket), T: Tectonic, L: Landslide, V: Volcanic, M: Meteorological, U: Unknown.
4. Validity score or comment presented here are directly adapted from source databases. Notations for assigned scores or comments are provided in square brackets.
5. Tsu. Int. 1: Tsunami intensity based on scale of Soloviev & Go (1974); Tsu. Int. 2: Tsunami intensity in Imamura-Iida scale.
6. Max. water level: The maximum water height above sea level (NGDC database), or the maximum observed or measured wave height (NTL database). Values from tide gauges measurements (since the use of tide gauges in 1950s) were rounded to the nearest cm.
7. Information of each entry came from 1 of the 15 source databases, which is listed under 'References'. Publications cited in source databases (secondary sources) for the entry are in brackets. Citations in angle brackets are Chinese or Japanese references, list of Chinese and Japanese references are at the end of reference list.
8. Zhou & Adams (1986) did not record this 1781-5-22 (#14) event.
9. Li et al. (2006) tabulated all discussed events, but dates of tsunamis #20 (1866-12-16), #22 (1867-12-18) and #42 (1978-7-23) as discussed in-text were wrongly listed as 1866-6-11, 1867-6-11 and 1978-3-12 respectively in the table.
10. Kansuh (or 'Kanchau') cannot be located for #23.

References of secondary sources listed in Table S1. Complete references are not available for some citations so they are presented in the same way as in source databases.

Álvarez, J.M.: Formosa, Geográfica e históricamente considerada, Barcelona, 1955.

Anonymous: Notes, Nature, 25, 324-326, 1882.

Anonymous: Report on the tsunami of the Chilean earthquake, 1960, Japan Meteorol. Agency, Tokyo, 1961. (in Japanese)

Anonymous: The climate, typhoons, and earthquakes of the Island of Formosa (Taiwan), Taihoku, 1914.

Bao, C.L. et al.: Ocean hazards and warning (海洋災害及預報), Ocean Press, Beijing, 1991. (in Chinese)

Central Daily (中央日報): 25<sup>th</sup> May 1960, 1960.

Chen, C.H.: Stimulation of tsunami propagation and inversion of submarine deformation of tsunami source region (海嘯傳播之模擬與海嘯源區海底形變之逆推), M.Phil thesis, National Taiwan Ocean University Institute of Oceanography, Keelung, 1994. (in Chinese)

Chen, K.C. and Wang, J.H.: A Study On Aftershocks And Focal Mechanisms Of Two 1986 Earthquakes In Hualien, Taiwan (一九八六年兩次花蓮地震的餘震和震源機制之研究), Journal of the Geological Society of China, 31(2), 65-72, 1988. (in Chinese)

China Earthquake Administration: Simplified List of the Chinese earthquake (中國強震簡目), Earthquake Press, Beijing, 1974. (in Chinese)

Chinese Academy of Sciences (Earthquake Work Committee): China Earthquake Data List Volume 2 (中國地震資料年表下冊), Science Press, Beijing, 1653pp., 1956. (in Chinese)

Cox, D.C., Iida, K., Soloviev, S.L. and Paras-Carayannis, G.: Pacific Tsunami Historic Files of NGDC, 'Boxes of publications were transferred to the World Data Center for Tsunamis, Boulder, in 1974. Since that time, these items have been re-filed or lost during moves.', 1974.

De Visme, S.: Account of an earthquake at Macao..., Philos. Trans. Roy. Soc. London abridged, 12(from 1763-1769), 607-608, 1809.

Dunbar P.K., Lockridge P.A. and Whiteside L.S.: Catalog of significant earthquakes, 2150 B.C. - 1991 A.D., NOAA/NGDC Report SE-49, Boulder, Colorado, 320pp., 1992.

Fang H.: Fang Hao's monograph collection in the age of 60 (方豪六十自定稿), Imprint: Taipei - author's self-publication, 1969. (in Chinese)

First Archive of China (中國第一歷史檔案館): Dynastic documents of the Kangxi emperor (康熙朝滿文硃批奏摺全譯), edited by Chinese Academy of Social Sciences (中國社會科學院), Xin Hua Bookstore, Beijing, 1996. (in Chinese)

Fuchs, C.W.C.: Bericht uber die vulkanische Ereignisse des Jahres 1867, Neues Jahrbuch fur Mineralogie, Geologie und Palaontologie, 1869. (in German)

Gao, Z.H., Li, Z.H., Ji, Y.T. and Xu, Y.S.: To Dispel Doubts on Historical Earthquake Tsunamis Along China Mainland Coast (中國大陸沿海地震海嘯析疑), Earthquake Research in China, 8(4), 102-107, 1992. (in Chinese)

Gu, G.X., Zhou, W.F. and Wang, R.L. (Eds.): Catalogue of Chinese Earthquakes (1831 B.C. - 1969 A.D.), Science Press, Beijing, China; English translation by Li Zengquan et al. provided through UNESCO, 872pp., 1989.

- Hai Tian.: Report on disaster reduction in China (中國減災報), Third edition, 1993.
- Hatori, T.: Tsunami Magnitudes in Taiwan, Philippines, and Indonesia, Zisin, Japan, 47, 155-162, 1994. (in Japanese)
- Hatori, T. and Koyama, M.: Travel times of tsunamis and reflection diagrams at the Pacific coast of Japan, B. Earthq. Res. I. Tokyo, 49(1-3), 127-142, 1971. (in Japanese)
- Herport.: Reisen nach Java, Formosa, Vorder-Indien und Ceylon, 1659-1663. (in German)
- Hoff, K.E.A, von.: Chronik der Erdbeben und Vulcanausbrüche, erster Theil vom Jahre 3460 vor, bis 1759 unserer Zeitrechnung, in Geschichte der durch überlieferung nachgewiesenen natürlichen Veränderungen der Erdoberfläche, Theil 4, Gotha, 1840. (in German)
- Holt, H.: Report of recent earthquakes in Northern Formosa, Quarterly Journal of the Geological Society of London, 24, 510, 1868.
- Hsu, H.: Source Materials on the History of Natural Disasters in Ching Taiwan (清代臺灣天然災害史料彙編), Disaster Prevention Technological research report no. 72-01, National Science Council, Taipei, 1983. (in Chinese)
- Hsu, M.K. and Chen, C.H.: Tsunami numerical stimulation of Taiwan coastal region (台灣近海地區海嘯數值模擬), Central Weather Bureau Technical note, 8: Project code MOTC-CWB-83-E-12, 1994. (in Chinese)
- Hsu, M.K. and Li, Q.T.: Tsunami in the region near Taiwan (台灣及其鄰近地區的海嘯), ACTA Oceanographica Taiwanica, 35(1), 1-16, 1996. (in Chinese)
- Hsu, M.T.: Earthquake and Tsunami (地震與海嘯), Taiwan Weather Bureau News Brief (氣象所簡訊), 256, 1-4, 1964. (in Chinese)
- Hsu, M.T.: Seismicity of Taiwan and some related problems, International Institute of Seismology and Earthquake Engineering Building Research Institute, 8, 41-160, 1971.
- Hsu, M.T.: Seismology (地震學). Li Ming Cultural Enterprise Company, Taiwan, 388pp, 1979. (in Chinese)
- Hsu, M.T.: Tsunami and hazards caused by it (海嘯及所引起之災害), China Meteorological Press, Beijing, 1981. (in Chinese)
- Hsu, M.T.: Evaluation of destructive Earthquake magnitude and intensity in Ming and Ching Eras (明清時代破壞性大地震規模及震度之評估), Meteorological Bulletin, 29(4), 1-18, 1983. (in Chinese)
- Iida, K.: Earthquakes accompanied by tsunamis occurring under the sea off the Islands of Japan, Journal of Earth's Sciences 4, 1956.
- Iida, K.: Magnitude of tsunamigenic earthquake, aftershock area, and area of tsunami origin, in: Geophysical Papers Dedicated to Prof. K. Sassa, Kyoto, 115-124, 1963a.
- Iida, K.: Magnitude, energy, and generation mechanisms of tsunamis and a catalogue of earthquakes associated with tsunamis, in: Proceedings of Tsunami meetings, associated with Tenth Pacific Science Congress, UGGI, Monographie, N24, Paris, 7-18, 1963b.
- Iida, K.: The generation of tsunamis and the focal mechanism of earthquakes, in: Tsunamis in the Pacific Ocean, Honolulu, 3-18, 1970.
- Imamura, A.: History of the Japanese tsunamis, Kaiyo no kagaku (Oceanography), 2(2), 2-8, 1942. (in Japanese)
- Imamura, A.: Catalogue of Japanese tsunamis, Zisin, 2nd series, 1(1), 23-28, 1949. (in Japanese)
- Imamura, A. and Moriya, M.: Mareographic observations of tsunami in Japan during the period from 1894 to 1924, J. Astr. Geophys. Japan, 17(1), 1939.
- International Tsunami Information Center: Tsunami Newsletter, 31, 1998-1999 Annual, 1999.



- Japan Meteorological Agency: The Confirmed Japanese Tsunami Records from Quarterly Journal of Seismology, 55, Japan Meteorological Agency, provided by the Japan Meteorological Agency, Tokyo, Japan (JMA: <http://www.jma.go.jp/jma/indexe.html>), with funding support by the Ministry of Education, Culture, Sports, Science and Technology (MEXT: <http://www.mext.go.jp/english/index.htm>), 2007.
- Kawasumi, H.: On the expectation of earthquake intensity at Kamakura, Saigai Kagaku Kenkyukai, 1-24, 1963. (in Japanese)
- Keimatsu, M.: On the historical tidal waves in China, Zisin, 16(3), 1963. (in Japanese)
- Kirby, S., Geist, E., Lee, W.H.K., Scholl, D. and Blakely, R.: Tsunami source characterization for Western Pacific Subduction Zones, in: USGS Tsunami Sources Workshop: Great Earthquake Tsunami Sources: Empiricism and Beyond Empiricism, USGU Menlo Park, USA, 21-22 April 2006, 2006.
- Kuno, H.: Catalogue of the Active Volcanoes of the World including Solfatara Fields, Part XI, Japan, Taiwan, and Marianas, International Association of Volcanology, Rome, Italy, 332pp., 1962.
- Lander, J. F. and Lockridge, P. A.: United States Tsunamis (Including United States Possessions) 1690-1988, National Oceanic and Atmospheric Administration, National Geophysical Data Center, Boulder, Colorado, USA, Publication 41-2, 265pp., 1989.
- Lander, J.F. and Whiteside, L.S.: The Tsunami History of Guam: 1849-1993, Science of Tsunami Hazards, 20(3), 158-174, 2002.
- Lee, T.Q.: Bulletin of the Institute of Earth Sciences Academia Sinica (中央研究院地球科學研究所彙刊), 1981. (in Chinese)
- Lee, W.H.K., Wu, F.T. and Jacobsen, C.: A Catalog of historical earthquakes in China compiled from recent Chinese publications, B.S.S.A., 66(6), 2003-2016, 1976.
- Li, Q.T.: Active fault and evaluation of its engineering work (活斷層及其工程評價), Earthquake Press, Beijing, 169pp., 1991. (in Chinese)
- Lin, Q.L.: A study on correlation between submarine earthquake and tsunami at Taiwan region (台灣地區海域地震與海嘯發生關聯性研究), 2006. (in Chinese)
- Liu, C.S.: An Historical Earthquake Accompanied by Tsunami and Volcanic Eruption (伴隨海嘯和火山爆發得一次歷史地震), China Earthquake News. 11-March-1989, 1989.
- Liu, P.L.F., Wang, X. and Salisbury, A.J.: Tsunami hazard and early warning system in South China Sea, J. Asian Earth Sci., 36(1), 2-12, 2009.
- Lockridge P. and Dunbar P.: Worldwide tsunamis: 2000 B.C. -1995, Boulder, Colorado, NOAA/NGDC Publication and Database, 31pp., 1996.
- Ma, Z.J. et al.: China's major disasters and mitigation measures (中國重大災害及減災對策), Science Press, Beijing, 1994. (in Chinese)
- Mallet, R.: Second Report on the Facts of Earthquake Phenomena, Report of the Twenty-first meeting of the British Association for the Advancement of Science, Ipswich, 1851, 272-320, 1852.
- Mallet, R.: Third report of the facts of earthquake phenomena. Catalogue of recorded earthquakes from 1606B.C. to A.D. 1850 (1755-1784), Report of the Twenty-Third Meeting of the British Association of Advancement of Science, London, 1854.
- Mallet, R.: Third report of the facts of earthquake phenomena. Catalogue of recorded earthquakes from 1606B.C. to A.D.

- 1850 (1606-1755), Report of the Twenty-Fourth Meeting of the British Association of Advancement of Science, London, 1855.
- Mallet, R. and Mallet, J. W.: The Earthquake Catalogue of the British Association, Transactions of the British Association for the Advancement of Science, 1852 to 1858, Reports 3 and 4, Taylor and Francis, London, 800pp., 1858.
- Massey, J.: Email sent to Dr. Gusiakov, Novosibirsk Tsunami Laboratory, and forwarded to National Geophysical Data Center from Mr. John Massey, Civil Engineering and Development Department, Geotechnical Engineering Office, Hong Kong, 2006.
- Milne, J.: A Catalogue of destructive earthquakes, A.D.7 to A.D. 1899, 16th report of the Committee on seismological investigations, Report of the 81st Meeting of the British Association for the Advancement of Science Held at Portsmouth in 1911, London, 1912.
- Montbeiliard, G. de.: Liste chronologique des eruptions de volcans, des treblements de terre, etc. Collection Academique, Partie Etrangere, Dijon-Paris, 6, 488-675. 1761. (in French)
- Musya, K.: Historical materials on earthquakes in Japan, Tokyo, 1951. (in Japanese)
- National Earthquake Administration: China Historical Earthquake Record (中國歷史強震目錄), Earthquake Press, Beijing, 1995. (in Chinese)
- National Earthquake Information Center (n/d NEIC): Preliminary Determination of Epicenters (PDE), a weekly and monthly publication, National Earthquake Information Center, U.S. Geological Survey, Golden, Colorado, 1971 to present.
- National Geophysical Data Center and World Data Center A for Solid Earth Geophysics (n/d NGDC & WDC-A): Tsunamis in the Pacific Basin 1900-1983, United States National Oceanic and Atmospheric Administration, Boulder, Colorado, 1984.
- National Palace Museum: Secret palace memorials of the Qianlong period, Taipei: National Palace Museum, 24, 754, 775-776, 793-794; 25, 355-356, 374, 837, 1982a (in Chinese)
- National Palace Museum: Secret palace memorials of the Qianlong period, Taipei: National Palace Museum, 52, 149-256, 1982b (in Chinese)
- Omori, F.: Preliminary notes on the Formosa earthquake of March 17, 1906, Bulletin of the Imperial Earthquake Investigation Committee, 1(2), 53-62, 1907.
- Omori, F.: Catalogue of strong earthquakes in Japan, Shinsai iobo tesakai hokoku, 88(C), 1919. (in Japanese)
- Perrey, A.: Note sur les tremblements de terre en 1856, avec supplements pour les annees anterieures, *Memories couronnes et autres memoires publies par l'Academie Royal de Belgique*, 8, 1-79, 1859. (in French)
- Perrey, A.: Note sur les tremblements de terre en 1860, avec supplements pour les annees anterieures, *Memories couronnes et autres memoires publies par l'Academie Royal de Belgique*, 14, 1-74, 1862b. (in French)
- Perrey, A.: Note sur les tremblements de terre en 1861, avec supplements pour les annees anterieures, *Memories couronnes et autres memoires publies par l'Academie Royal de Belgique*, 16, 1-112, 1864. (in French)
- Perrey, A.: Note sur les tremblements de terre en 1866 et 1867, avec supplements pour les annees anterieures, de 1843 a 1865, *Memories couronnes et autres memoires publies par l'Academie Royal de Belgique*, 21, 1-223, 1870. (in French)
- Perrey, A.: Note sur les tremblements de terre en 1868, avec supplements pour les annees anterieures, de 1843 a 1867, *Memories couronnes et autres memoires publies par l'Academie Royal de Belgique*, 21, 1-116, 1872. (in French)

French)

- Perrey, A.: *Supplements aux notes sur les tremblements de terre ressentis de 1843 a 1868, Memories couronnes et autres memoires publies par l'Academie Royal de Belgique*, 23, 1-70, 1873. (in French)
- Ponyavin, E.D.: *Tsunami waves*, Leningrad, Gidrometeoizdat, 1965. (in Russian)
- Rudolph, E.: *Katalog der im Jahre 1903 Bekannt gewordenen Erdbeben*, Leipzig, 1905. (in German)
- Schouten, F.: *Voyage aux Indes Orientales, commence l'an 1658, et fini l'an 1665*, Trad. Du hollandais, T.I. Amsterdam, 271-272, 1708. (in French)
- Sieberg, A.: *Erdbebengeographie, Handbook of Geophysics*, 4(3), 1932. (in German)
- Soloviev, S.L. and Go, Ch.N.: *A catalogue of tsunamis on the eastern shore of the Pacific Ocean*. Academy of Sciences of the USSR, Nauka Publishing House, Moscow, 204 pp., (Canadian Translation of Fisheries and Aquatic Sciences No. 5078, 293pp., 1984.), 1975.
- Taihoku Meteorological Observatory: *The climate, typhoon and earthquakes of the Island of Formosa (Taiwan)*, Taihoku Meteor. Observ., Taihoku, Taiwan, 74, 1914.
- Takahasi, R.: *An estimate of future tsunami damage along the Pacific coast of Japan*, B. Earthq. Res. I. Tokyo, 29(1), 1951.
- The Annual Register: *or a View of the History, Politics, and Literature, for the year 1765*, J. Dodsley, London, 1766.
- The China Mail: "... a certain ship, 30 miles to sea off Amoy (Xiamen), and sailing in 15 fathoms of water felt the shock distinctly. Another ship which was in Swatow (Shantou) at the time, lying alongside the wharf, touched bottom.", 15th February 1918.
- The China Mail: "Reports were current in the Colony (Hong Kong) yesterday, that Amoy had suffered as much, if not more than Swatow, and also that a tidal wave had caused tremendous damage. We are happily able to state that very little damage has been done in that city.", 17th February 1918.
- Tokunaga, K. and Katsumata, M.: *List of major earthquakes in and near Japan, during the period from 1961 through 1970*, Quarterly Journal of Seismology, 36(3-4), 97-107, 1971. (in Japanese)
- Tsai, Y.B.: *A study of Disastrous Earthquakes in Taiwan, 1683-1895*, Bulletin of the Institute of Earth Sciences, Academia Sinica, 5, 1-44, 1985.
- U.S. Department of the Interior, Geological Survey and U.S. Department of Commerce, National Oceanic and Atmospheric Administration: *United States Earthquakes*, Annual publication, prepared by U.S. Coast and Geodetic Survey, 1928-1968; prepared by NOAA 1969-1972; prepared by NOAA in cooperation with U.S. Geological Survey 1973-1980, prepared by U.S. Geological Survey 1981-1983, Superintendent of Documents, U.S. Government Printing Office, Washington, D.C., 1928-1983.
- United Daily (聯合報): 25<sup>th</sup> May 1960, 1960.
- Usami, T.: *Overview of damaging earthquakes at Japan (日本被害地震総覧)*, University of Tokyo Press, Tokyo, 1977. (in Japanese)
- Von Hake, C.A. and Cloud, W.K.: *United States Earthquakes 1963*, U.S. Coast Geodetic Survey, Washington, D.C., 67 pp., 1965.
- Wahanabe, H.: *Descriptive table of tsunamis in and near Japan*, Zisin, 21(3), 293-313, 1968. (in Japanese)
- Wigen, S.O.: *Historical Study of Tsunamis at Tofino, Canada*, in: *Tsunamis--Their Science and Engineering*, Iida K. and Iwasaki T. (Eds.), Terra Scientific Publishing Company (TERRAPUB), Tokyo, Japan, 105-119, 1983.
- Xie, Y.S.: *China Earthquake History Data Catalogue (中國地震歷史資料彙編)*, Science Press, Beijing, 1982-1988. (in

Chinese)

- Yang, C.S., Teng, L.W. and Shao, J.L.: Study of the value projection of earthquake-inducing tsunami at NE coast of Taiwan (台灣東北部海岸地震海嘯數值推算之研究), National Science Council, 1983. (in Chinese)
- Yi, X.L., Yu F.J. and Wong, W.T.: National Report of China, IOC/PTWS-XXII/14.4, Guayaquil, Ecuador, 6-8, 2007.
- Yu, S.B., Chen, L.C. and Kuo, L.C.: Velocity field of GPS stations in the Taiwan area, *Tectonophysics*, 274, 41-59, 1997.
- Zhuo, X.R. and Chen, G.T.: On the focal mechanisms of earthquakes and regional stress field of the Fujian-Taiwan region, *ACTA Seismologica Sinica*, 5(4), 397-411 1983. (in Chinese, with English abstract)

### Chinese and Japanese references

- <Changhua county report>: 彰化縣誌
- <Chaoyang County record made in 1884>: 光緒十年潮陽縣志
- <Chaoyang county report>: 潮陽縣誌
- <Chaozhou record made in 1661>: 順治十八年潮州府志
- <Chaozhou record made in 1694>: 康熙二十三年潮州府志
- <Chenghai county report>: 澄海縣誌
- <Chieyang county report>: 揭陽縣誌
- <Dynasty Ming and Ching history>: 明清史料戊篇
- <Dynasty Yuan record>: 元史五行志
- <Dynasty Zong record>: 宋史五行志
- <Japanese Earthquake Historical Data>: 日本地震史料, p.756-757
- <Quanzhou historical record>: 萬歷泉州府志
- <Taiwan government record>: 臺灣府誌
- <Taiwan record of tax and labour>: 台灣府賦役冊
- <Taiwan record>: 台灣小志
- <Tongan county report of 1929>: 民國十八年同安縣志
- <Tongan record in period of Republic of China>: 民國同安縣志
